1 **Pazopanib induces dramatic but transient contraction of myeloid suppression**  
2 **compartment in favor of adaptive immunity**

3  
4 Darawan Rinchai<sup>1α</sup>, Elena Verzoni<sup>2α</sup>, Veronica Huber<sup>3</sup>, Agata Cova<sup>3</sup>, Paola Squarcina<sup>3</sup>, Loris  
5 De Cecco<sup>4</sup>, Filippo de Braud<sup>2</sup>, Raffaele Ratta<sup>2</sup>, Matteo Dugo<sup>4</sup>, Luca Lalli<sup>3</sup>, Viviana Vallacchi<sup>3</sup>,  
6 Monica Rodolfo<sup>3</sup>, Jessica Roelands<sup>1</sup>, Chiara Castelli<sup>3</sup>, Damien Chaussabel<sup>5</sup>, Giuseppe  
7 Procopio<sup>2</sup>, Davide Bedognetti<sup>1,6Ω</sup>, Licia Rivoltini<sup>3Ω</sup>

8  
9 <sup>α/Ω</sup> Contributed equally

10  
11 <sup>1</sup>Cancer Research Department, Sidra Medicine, Doha, Qatar

12 <sup>2</sup>Hopital Foch, Medical Oncology Department, Suresnes, France

13 <sup>3</sup>Unit of Immunotherapy of Human Tumors, Fondazione IRCCS Istituto Nazionale dei Tumori,  
14 Milan, Italy

15 <sup>4</sup>Platform of Integrated Biology, Fondazione IRCCS Istituto Nazionale dei Tumori, Milan, Italy

16 <sup>5</sup>Immunology Department, Sidra Medicine, Doha, Qatar

17 <sup>6</sup>Dipartimento di Medicina Interna e Specialità Mediche, Università degli Studi di Genova,  
18 Genova, Italy

19  
20  
21 ***Corresponding authors***

22 Licia Rivoltini, MD

23 Unit of Immunotherapy of Human Tumors

24 Fondazione IRCCS Istituto Nazionale dei Tumori, Milan, Italy

25 [licia.rivoltini@istitutotumori.mi.it](mailto:licia.rivoltini@istitutotumori.mi.it)

26  
27 Davide Bedognetti, MD, PhD

28 Cancer Research Department

29 Sidra Medicine, Doha, Qatar

30 [dbedognetti@sidra.org](mailto:dbedognetti@sidra.org)

31  
32

33

34

35

36

37

38

39

40

1 **Abstract**

2 Anti-angiogenic tyrosine-kinase inhibitors (TKIs) and immune checkpoint blockade (ICB)  
3 constitute the backbone of metastatic renal cell carcinoma (mRCC) treatment. The  
4 development of the optimal combinatorial or sequential approach is hindered by the lack of  
5 comprehensive data regarding TKI-induced immunomodulation and its kinetics. Through the  
6 use of orthogonal transcriptomic and phenotyping platforms combined with functional analytic  
7 pipelines, we demonstrated that the anti-angiogenic TKI pazopanib induces a dramatic and  
8 coherent reshaping of systemic immunity in mRCC patients, downsizing the myeloid-derived  
9 suppressor cell (MDSC) compartment in favor of a strong enhancement of cytotoxic T and  
10 Natural Killer (NK) cell effector functions. The intratumoral expression level of a MDSC  
11 signature here generated was strongly associated with poor prognosis in mRCC patients. The  
12 marked but transient nature of this immunomodulation, peaking at the 3<sup>rd</sup> month of treatment,  
13 provides the rationale for the use of TKIs as a preconditioning strategy to improve the efficacy  
14 of ICB.

15  
16 **Keywords: (3-10)**

17 Renal cell cancer, tyrosine kinase inhibitors, immunotherapy, immunosuppression, myeloid-  
18 derived suppressor cells, PBMCs, Pazopanib, blood transcriptomic profile, transcriptional  
19 modular repertoire analysis, antiangiogenics

20  
21  
22  
23  
24  
25  
26  
27  
28  
29  
30  
31  
32  
33  
34  
35  
36  
37  
38  
39  
40  
41  
42  
43  
44  
45  
46  
47  
48  
49  
50  
51  
52

| 1  | <b>Abbreviation List</b> |                                               |
|----|--------------------------|-----------------------------------------------|
| 2  |                          |                                               |
| 3  | DC                       | Dendritic cell                                |
| 4  | iDC                      | Immature dendritic cell                       |
| 5  | mDC                      | Myeloid dendritic cells                       |
| 6  | pDC                      | Plasmacytoid dendritic cells                  |
| 7  | ICB                      | Immune checkpoint blockade                    |
| 8  | IFN                      | Interferon                                    |
| 9  | IPA                      | Ingenuity Pathway Analysis                    |
| 10 | MDSC                     | Myeloid derived suppressor cells              |
| 11 | G-MDSC                   | Granulocytic Myeloid derived suppressor cells |
| 12 | M-MDSC                   | Monocytic Myeloid derived suppressor cells    |
| 13 | mRCC                     | Metastatic renal cell carcinoma               |
| 14 | NK                       | Natural killer cell                           |
| 15 | PCA                      | Principal component analysis                  |
| 16 | PBMCs                    | Peripheral blood mononuclear cells            |
| 17 | Tcm                      | Central memory T cell                         |
| 18 | Tem                      | Effector memory T cells                       |
| 19 | Tfh                      | T follicular helper cells                     |
| 20 | Th2 cells                | T helper 2 cells                              |
| 21 | Th1 cells                | T helper 1 cells                              |
| 22 | Th17 cells               | T helper 17 cells                             |
| 23 | Tgd                      | T gamma delta cells                           |
| 24 | Treg                     | Regulatory T cell                             |
| 25 | TKI                      | Tyrosine-kinase inhibitor                     |
| 26 | VEGF                     | Vascular endothelial growth factor            |
| 27 |                          |                                               |

## 1 **Introduction**

2 The off-target activity of cancer treatments on systemic immunity is a well-known process,  
3 deemed to play an active role in disease control [1]. In the course of conventional therapies  
4 including chemotherapy or radiotherapy, a reshaping of spontaneous immune response  
5 toward a boost of tumor-specific T cells might be required to achieve significant clinical benefit  
6 [2]. Such a reinvigoration of adaptive T cell immunity stems from a network of effects triggered  
7 by tumor cell death, amplified by additional mechanisms involving multiple immune pathways  
8 depending on the drug's mechanism of action [3].

9 The immunomodulatory properties of cancer therapies are recently gaining attention in  
10 view of potential combinations with immunotherapy such as immune checkpoint blockade  
11 (ICB). The nowadays consolidated evidence that ICB mediates effective tumor control only in  
12 a minority of patients and in selected malignancies, points to the use of drug combinations as  
13 a strategy to increment ICB effectiveness [4]. Promising results showing increased efficacy of  
14 PD-1 blockers combined with chemotherapy in non-small cell lung cancer (NSCLC) [5] and  
15 breast cancer [6, 7], along with multiple clinical trials ongoing in different tumor types, suggest  
16 that combinatorial approaches hold promise to become the potential gold standard of treatment  
17 in different settings.

18 However, the effects of cancer therapies on the multiple components of tumor immunity  
19 might be complex and variegated and need to be carefully considered when combination  
20 strategies based on desired synergies are designed. Antineoplastic treatments might directly  
21 potentiate tumor immunogenicity by broadening antigenic repertoire or favoring antigen  
22 presentation that boost T cell priming [5]; or they can act indirectly by reducing myeloid-derived  
23 suppressor cell (MDSC)-mediated immunosuppression as a beneficial outcome of their  
24 common myelotoxicity [8]. Conversely, according to *in vitro* and/or *in vivo* experimental studies,  
25 anti-proliferative therapeutic strategies, particularly those based on the inhibition of multiple  
26 tyrosine kinases, might affect T cell proliferation and function as well, thus potentially interfering  
27 with the protective activity of adaptive immunity [9–12]. Hence, gaining detailed information on  
28 the type and kinetics of the immunomodulating properties of anticancer drugs would be

1 essential to maximize clinical efficacy when diverse therapeutic strategies are combined with  
2 immunotherapy.

3         Given the complexity of the human immune system and its dynamic nature,  
4 immunomonitoring approaches are moving toward multiplex and “omics” strategies, with first  
5 results emerging in autoimmunity and viral infections [13, 14]. Transcriptomic analysis of  
6 peripheral blood [15, 16] for instance, has been extensively used to dissect mechanisms of  
7 action of vaccination against infectious diseases [17], to elucidate pathogenic mechanisms of  
8 different immunologic disorders [18, 19], and to identify perturbations associated with different  
9 viral [20], parasitic [21], or bacterial infections [18, 22]. However, such an approach remains  
10 relatively unexplored in the context of cancer therapy, including immunotherapy [23].  
11 Pioneering studies in cancer patients treated with interleukin (IL)-2 have contributed to the  
12 characterization of systemic changes induced by this cytokine [24–26]. More recently,  
13 peripheral blood transcriptomic analysis has been used to identify signatures associated with  
14 responsiveness to anti-CTLA4 [27], and to describe changes differentially associated with  
15 CTLA4 and combined CTLA4/PD-1 blockade [23, 28]. To the best of our knowledge, no  
16 peripheral blood transcriptomic studies have been performed so far in solid cancer patients  
17 receiving tyrosine kinase inhibitors (TKI) or in renal cell carcinoma (RCC) patients treated with  
18 any other drugs. According to first-line randomized 3 metastatic RCC trials using PD-1  
19 blockades, up to 50-60% of patients do not respond to such treatment [29–31]. Recently, a  
20 retrospective analysis of the CheckMate 025 phase III trial demonstrated a remarkable  
21 increased overall survival (HR, 0.60; 95% CI,.0.42–0.84) in patients previously treated with  
22 first-line pazopanib [32].

23         In the present work, we applied an integrative analysis encompassing transcriptional  
24 profiling (leucocyte subtype abundance estimation, functional characterization by pathway  
25 analysis and modular repertoire analysis) and multiplex flow cytometry, to comprehensively  
26 capture the immunomodulation mediated by anti-angiogenic treatment in mRCC patients.  
27 RCC was specifically chosen for its potent immunosuppressive properties linked to  
28 hypoxia/VHL-related oncogenic pathways that lead to the secretion of proangiogenic factors

1 known to mediate the blunting of adaptive antitumor immunity [33]. Anti-angiogenic drugs  
2 interfering with one or multiple factors of the VEGF, PDGF, HGF and ANG2 cascade, are  
3 endowed with the intrinsic ability to overcome VEGF-mediated immunosuppression [34, 35].  
4 Here, we investigated the entity and the kinetics of immunomodulation mediated in mRCC  
5 patients by pazopanib, a TKI anti-angiogenic drug included in the standard care of this disease  
6 [36–38].

7 By performing a matched analysis of transcriptional and phenotypic profiling in  
8 peripheral blood mononuclear cells (PBMCs) obtained before and at different time points  
9 during therapy, we demonstrated, for the first time, that pazopanib mediates a potent but  
10 transient reprogramming of systemic immunity, resulting in an enhanced T and NK cytotoxic  
11 response accompanied by an attenuation of the myeloid suppressor compartment. Our study  
12 shows that monitoring systemic immunity by transcriptomics may help designing drug-tailored  
13 combination strategies aimed at maximizing clinical efficacy thanks to the timely engagement  
14 of a full-fledged immune response.

15

## 16 **Results**

### 17 **Integrative transcriptional analysis reveals the immune modulatory properties of** 18 **pazopanib.**

19 The study has been conducted on clear cell mRCC patients treated with first line pazopanib,  
20 whose PBMCs were obtained from blood withdrawn at baseline, 3- and 6-months during  
21 treatment. Transcriptional profiling was analyzed using integrative and complementary  
22 pipelines.

23 We first wanted to explore the molecular heterogeneity of the sample set through  
24 principal component analysis (PCA) based on the whole transcriptomic profile (12,913 genes)  
25 (**Figure 1A**). The first 3 major PCs accounted for 20.7% (PC1), 10.7% (PC2), and 8.0% (PC3)  
26 of the variability observed for these conditions. These three-dimensional plots showed the  
27 distribution of individual patient samples for each time point with no outlier sample **Figure 1A**.  
28 In general, a certain degree of separation according to different time points was observed.

1 We then performed differential expression analysis between post-treatment versus  
2 pre-treatment samples. Two hundred and thirteen transcripts were significantly different  
3 between 3 months post-treatment (*Post 3*) and pre-treatment (*Pre*), 47 transcripts between 6  
4 months and 3 months post-treatment (*Post 6 vs Post 3*), and 98 transcripts between *Post 6*  
5 and *Pre*. Volcano plots showing log<sub>2</sub> fold-change (log<sub>2</sub>FC) and *p*-value (*paired t-test*) on  
6 differentially expressed genes are shown in **Figure 1B**, and **Supplementary Table 1**.  
7 Strikingly, among the top 40 genes ranked according to the log<sub>2</sub>FC, the large majority was  
8 associated with cytotoxic functions and interferon signaling (**Table 1**). Representative  
9 transcripts related to T and NK cells cytotoxic functions and T cells activation (e.g., *CD8A*,  
10 *CD160*, *GZMB*, *GZMH*, *KLRD1*, *KLRB1*, *NRC3*, *LAG3*, *IL12RB1*, *KIR2DL1*, *NCR1*, *NKG7*,  
11 *PRF1* and *GNLY*) are represented in **Figure 1C**. The over-expression of such transcripts was  
12 attenuated at 6 months after treatment. The common transcripts significantly up-regulated at  
13 both *Post 3* and *Post 6* (*N=16*) as compared to pre-treatment include *CD8A*, *CTSW*, *NCAM1*  
14 (*CD56*), *NCR3*, *NKG7*, consistent with a persistence but attenuated NK and T cell response  
15 [39] (**Figure 1B**, and **Supplementary Table 1**).

16

### 17 **Functional interpretation of transcriptomic changes induced by pazopanib**

18 The top ten differentially modulated canonical pathways in post-treatment vs pre-treatment  
19 samples are shown in **Figure 2A-C**. Genes of the top 3 pathways in each comparison are  
20 shown in **Figure 2D**. The graphical representation of the top pathway at each time point  
21 comparison is shown in **Supplementary Figure 1**. The majority of the top canonical pathways  
22 modulated by pazopanib (7/10 in both *Post 3* and *Post 6* comparison) were associated with  
23 immune functions (**Figure 2A-D**). The perturbations induced at the 3<sup>rd</sup> month of treatment are  
24 consistent with the triggering of NK/cytotoxic signaling, the positive modulation of the crosstalk  
25 between dendritic cells and NK cells, the regulation of IL-2, T cell receptor (TCR) signaling,  
26 and IL-8 signaling. After 3 further months of treatment, an attenuation of the immune  
27 modulatory effect induced by pazopanib was observed. This was substantiated by the  
28 downregulation of transcripts associated with T helper (Th)-1 and Th2 functional orientation

1 when comparing *Post 6 vs Post 3* samples. The activation of NK-related pathways was still  
2 sustained at the 6<sup>th</sup> month of treatment, although attenuated.

3

#### 4 **Pazopanib-induced molecular fingerprints**

5 We applied modular repertoire analysis to further dissect the immune-modulatory properties  
6 of pazopanib. The percentage of responsive transcripts constitutive of a given module was  
7 determined at each time point (see methods for details). The group comparison analysis  
8 confirmed that module perturbations peaked at 3 months of treatment and decreased at 6  
9 months. These perturbations include upregulation of modules M3.6 and M8.46 defining  
10 cytotoxic/NK cells, M4.11 (plasma cells), and M8.89 (immune response). Moreover, the  
11 responsiveness of M4.14 (monocytes) was decreased (**Figure 3**). However, mapping  
12 perturbations of the modular repertoire for a group of subjects does not account for the  
13 heterogeneity observed at the individual level. We therefore performed deeper individual-level  
14 analysis. This approach demonstrated that pazopanib administration was associated with the  
15 decrease of M9.34 (immunosuppressive) in the majority of patients. The most coherent  
16 changes were represented by modulations of cytotoxic/NK cells modules (M3.6 and M8.46)  
17 while the majority of the other modules demonstrated a considerable heterogeneity.  
18 Interestingly, a rapid increase of Interferon (IFN) modules (M1.2 and M3.4) was observed  
19 exclusively in patients displaying up-regulation of cytotoxic/NK cells modules (**Figure 4,**  
20 **Supplementary Table 2**)

21

#### 22 **Modulation of leukocyte functional orientation induced by pazopanib as derived by** 23 **transcriptomic data**

24 To estimate the changes in leukocyte populations, we used single sample Gene Set  
25 Enrichment Analysis (ssGSEA). Comparison of the enrichment scores of post-treatment and  
26 their baseline pre-treatment, showed that NKCD56<sup>dim</sup>, NKCD56<sup>bright</sup>, T gamma-delta (Tgd),  
27 NKT, cytotoxic cells and CD8 T cells increased coherently at 3 months of treatment and  
28 subsequently slightly decreased without reaching baseline levels (**Figure 5**). Conversely,



1 regulatory T cells (Tregs) signature was decreased and a similar trend was observed for  
2 MDSCs (**Figure 5C**). These results suggest that pazopanib induces synergistic immune  
3 modulations by enhancing protective immunity and reducing suppressive mechanisms.

4

#### 5 **Flow cytometry analysis confirms the positive immune modulation associated with** 6 **pazopanib administration**

7 Transcriptome profiling in bulk cell populations provided a high-level and unbiased perspective  
8 on the changes taking place following initiation of therapy. It is ideally complemented by flow  
9 cytometry analyses which provide a targeted but highly granular view of changes taking place  
10 at the cellular and protein levels.

11 Multicolor flow cytometry analysis of PBMCs was performed concomitantly in biological  
12 replicates of the same blood samples submitted to transcriptional profiling, plus an additional  
13 patient for whom RNA was not available. A broad panel of markers encompassing innate and  
14 adaptive immune cell subsets of the lymphoid and myeloid repertoire was studied and  
15 modulation in on-treatment with respect to baseline samples was assessed. The analysis  
16 showed that pazopanib administration was associated with a remarkable increase of activated  
17 and cytolytic effectors including the subset of activated T cells (CD3<sup>+</sup>PD-1<sup>+</sup>), reported to  
18 contain tumor-specific T cells [40], activated NK cells (CD3<sup>+</sup>CD16<sup>+</sup>CD56<sup>+</sup>PD-1<sup>+</sup>) and cytotoxic  
19 NK cells (CD3<sup>-</sup>CD16<sup>+</sup>CD56<sup>dim</sup>) (**Figure 6**) [41]. Of note, this evidence is in line with the data  
20 that emerged from the transcriptional profiling, depicting an overall boost of genes involved in  
21 TCR signaling, cytotoxic cell populations and NK activity. Again, similarly to findings obtained  
22 via transcriptomic analyses, the detected changes over baseline were more evident at 3  
23 months of therapy and tended to a plateau or decreased at 6 months. The boost of T and NK  
24 cell activation was paralleled by a significant decrease in the frequency of different myeloid  
25 cell subsets, including CD14<sup>+</sup> monocytes, MONO-MDSCs (CD14<sup>+</sup>HLA-DR<sup>neg</sup>) [42],  
26 inflammatory monocytes (CD14<sup>+</sup>PDL-1<sup>+</sup>) [43], and PMN-MDSCs (CD15<sup>+</sup>) [42](**Figure 6A**).  
27 Regulatory T cells (CD4<sup>+</sup>CD25<sup>high</sup>Foxp3<sup>+</sup>) also displayed a remarkable reduction during  
28 treatment. Down-modulation of all these cell subsets was mostly detectable at 3 months during

1 treatment with respect to baseline, with a stabilization of monocytic MDSCs or/and a rebound  
2 for total and inflammatory monocytes in cell frequencies at 6 months (**Figure 6**). Taken  
3 together, the kinetics of immune modulation as detected by flow cytometry are in line with the  
4 data emerging from the transcriptional profiling data and confirm the transient nature of  
5 immunomodulation mediated by pazopanib.

6

### 7 **Intratumoral estimates of MDSC are associated with poor prognosis in kidney cancer**

8 One of the more remarkable findings obtained through combined transcriptomic and flow-  
9 cytometry based immune monitoring is the decrease in MDSC populations and associated  
10 signatures.

11 To explore the relevance of our observation, and as no data exists regarding the  
12 prognostic role of MDSCs in kidney cancer, we assessed the expression of the three MDSC  
13 signatures in The Cancer Genome Atlas (TCGA) clear cell RCC cohort (KIRC, N=517, **Figure**  
14 **7**). The MDSC\_INT signatures was strongly associated with decreased overall survival  
15 (MDSC\_INT High vs LowMed, HR =2.057 (95% CI = 1.52-2.79, **Figure 7A**). In particular,  
16 MDSC High group had poor prognosis, while MDSC Low and Med group (**Supplementary**  
17 **Figure 2**) have similar favorable prognosis. No such differences were observed using the  
18 other two MDSC signatures MDSC\_Angel and G-MDSC, suggesting that MDSC\_INT, which  
19 was developed experimentally based on extracellular-driven monocyte-MDSC differentiation,  
20 might represent a novel prognostic biomarker in kidney cancer. Remarkably, MONO-MDSCs  
21 were strongly suppressed after pazopanib treatment (**Figure 6**). MDSC\_INT correlates with  
22 Stage and Grade, which are major prognostic factors in kidney cancer (**Figure 7B**). We then  
23 assessed the relationship between MDSC\_INT with the disposition of oncogenic pathways,  
24 and found that MDSC\_INT expression linearly correlates with many oncogenic processes  
25 associated with cancer aggressiveness, including angiogenesis ( $R = 0.59$ ,  $p < 2e-16$ ), and  
26 epithelial-to-mesenchymal transition (EMT) ( $R = 0.75$ ,  $p < 2e-16$ , **Figure 7C-D**) although  
27 there was no overlapping between MDSC\_INT signature and angiogenesis or EMT  
28 (**Supplementary Figure 3**). Despite the correlation with Stage and Grade, MDSC\_INT

1 retained its prognostic value even when included in a Cox regression multivariable model  
2 **(Figure 7E).**

3 Thus, the analysis of the tumor specimens from the TCGA cohort permitted to expand  
4 our initial finding by providing indirect evidence about the role of MDSCs in mRCC  
5 progression. Indeed, this in turn suggests that MDSC suppression by pazopanib may be one  
6 of the means by which treatment could contribute to improved outcome.

7

## 8 **Discussion**

9 This is the first translational study that investigates longitudinally the immunomodulatory  
10 effects of an anti-angiogenic therapy on PBMCs of mRCC patients through transcriptomic  
11 analysis. Our results show that pazopanib triggers cytotoxic cells and IFN pathways and  
12 relieves immunosuppression by reducing MDSCs. This invigoration of anti-tumor immunity  
13 was mostly evident after 3 months of therapy and still detectable, although less accentuated,  
14 at the 6<sup>th</sup> month of treatment. The transcriptional profiling of PBMCs clearly revealed  
15 treatment-induced immunomodulation, detecting modifications validated by flow cytometry,  
16 but also expanding them by revealing pathway networks and broader functional information.  
17 Our data indicates that the analysis of transcriptional profiles of blood cells with the support of  
18 appropriate deconvolution approaches represents a valid strategy for monitoring immune cell  
19 behavior at a high throughput and reliable level.

20 To achieve the results reported here, one of the major challenges was the identification  
21 of gene-signatures appropriate to capture the activity of circulating MDSCs. Indeed, monocytic  
22 MDSCs are defined in flow cytometry only by the lack/low expression of HLA-DR in cells  
23 expressing the monocytic marker CD14, alone or in combination with CD11b and CD33 [42],  
24 but their genomic features have been poorly defined. To this aim, we used the dataset selected  
25 by Angelova [44] and Fridlender [45] as reference transcriptional data for myeloid cells and  
26 the data set obtained from human MDSCs generated *in vitro* according to a model developed  
27 in our laboratory [46]. This MDSC model was produced by exposing blood CD14<sup>+</sup> monocytes  
28 to tumor extracellular vesicles, a process leading to cells highly overlapping for phenotype,

1 immunosuppressive function and transcriptional profiles with MDSCs isolated from blood of  
2 melanoma patients [46–48]. The gene signature reflects most of the signaling pathways  
3 expected for these cells and overlap with monocytes sorted from cancer patients [46]. Our  
4 MDSC signature, applied to bulk tumors, was the only one with prognostic implications in  
5 mRCC, confirmed in multivariate analyses, providing here an essential contribution for the  
6 estimations of MDSCs in different tissues.

7 Pazopanib is a multikinase inhibitor, among the ones of standard of care for first-line  
8 treatment of mRCC patients, especially if they are "low risk" according to Heng criteria. This  
9 TKI targets the VEGF receptor, platelet-derived factor receptor (PDGFR), KIT (proto-  
10 oncogene receptor tyrosine kinase), fibroblast growth factor receptors (FGFR) and RAF  
11 kinases [36–38]. The broad array of targets largely justifies the multifaceted  
12 immunomodulating activity we observed in our study, which involved different myeloid cell  
13 subsets together with T cells, NK cells and Tregs. However, given the known inhibitory activity  
14 of several antiangiogenics on lymphocytes when tested *in vitro* [49], it is tempting to speculate  
15 that this general immunological reshaping mostly stems from blunting of the complex  
16 immunosuppressive pathways mediated by MDSC and Tregs. Indeed, pazopanib might exert  
17 off-target inhibitory effects on MDSCs by acting on the VEGFR down-stream signaling [50,  
18 51], or by interfering with the KIT pathway, another key node in myeloid cell function favoring  
19 DC reprogramming [8]. Hence, the boost of T and NK cell activation and cytolytic functions we  
20 broadly observed by both transcriptomics and flow cytometry, likely results from reduced  
21 intratumoral immunosuppression leading to an enhanced anti-tumor immune response, rather  
22 than from a stimulatory activity of the drug on these immune cell subsets.

23 A recent study demonstrated that pazopanib induces DC maturation *in vitro* [52], while  
24 novel VEGF-directed drugs, such as axitinib, enhances the expression of NKG2D ligand and  
25 consequently potentiates NK-cell cytolytic activity [53].

26 Previous studies in humans have shown that the anti-VEGF monoclonal antibody  
27 sunitinib reduces the abundance of monocytes [54] (assessed 4 and 6 weeks post-treatment),  
28 monocytic MDSCs [55] and Tregs [56] (assessed at 4 weeks after treatment only) in the blood.

1 However, the persistence of Tregs suppression (assessed at 1.5 and 3 months post-  
2 treatment) has been correlated with prolonged overall survival [57]. There are no studies that  
3 have assessed immunologic perturbations in patients receiving pazopanib as first line  
4 treatment. Only one study has assessed immunologic changes in mRCC patients treated with  
5 pazopanib, but administered as third-line treatment, therefore studying patients with a  
6 potentially heavily compromised immune system. In such work, Pal *et al* [58] observed that  
7 post-treatment non-responder patients had lower levels of HGF, VEGF, IL-6, IL-8 and soluble  
8 IL-2R, and increased numbers of monocytic MDSCs as compared with responders. Failure to  
9 detect an overall decrease of MDSCs as compared to baseline might result from the fact that  
10 analyses were performed at late time points (at 6 and 12 months after treatment initiation). In  
11 fact, our study showed that the changes induced by pazopanib partially revert after 6 months.

12         The number of patients analyzed here was rather small but reflected the rarity of RCC  
13 patients who could be prospectively enrolled for first-line pazopanib administration especially  
14 in research hospitals with competitive clinical trials enrolling. Even so, dynamic changes were  
15 extremely coherent across patients and confirmed using orthogonal immune monitoring  
16 platforms and analyses. The data reported here provide a set of key information that might  
17 have relevant implications for the design of combinatory treatment strategies in mRCC clinical  
18 setting. First, pazopanib mediates a specific reshaping of tumor immunity that should favor a  
19 prompter response to immunotherapy due to the decrease of immunosuppressive effectors  
20 and the concomitant boost of PD-1<sup>+</sup> T cells and NK cells. Secondly, this effect reaches its  
21 peak at the 3<sup>rd</sup> month of treatment but tends to be attenuated at later time points likely due to  
22 the homeostatic mechanisms that regulate systemic immunity and tumor-mediated  
23 immunosuppression. These data indicate that a short-term pre-conditioning treatment with  
24 pazopanib might create the optimal immune setting for ICB to potentiate antitumor immune  
25 responses *in vivo*. In this view, the combination of pazopanib with PD-1 blockers, which  
26 resulted so far in unmanageable toxicity during initial clinical testing [59], could be replaced  
27 by intermittent schedules that might help maximizing treatment synergies. The concomitant  
28 administration of PD-1/PD-L1 inhibitors with anti-angiogenic monoclonal antibodies

1 (bevacizumab, IMmotion 151 trial) [60] or TKI axitinib (MK426 [61] and JAVELIN RENAL101  
2 [62] trials), is rapidly emerging as a strategy to increase overall survival in RCC patients, with  
3 further ongoing studies evaluating combination with novel TKI lenvatinib (CLEAR trial),  
4 cabozantinib (CheckMate 9ER), and tivozanib [63] but the optimal schedule of such  
5 combinations still needs to be defined. In this context, our data suggest that more dynamic  
6 and innovative approaches based on intermittent or alternate schedules could be also  
7 explored to ameliorate the therapeutic index of combinatorial regimens in cancer [64, 65].

8

## 9 **Conclusion**

10 Transcriptional profiling of blood immune cells, particularly if combined with specific  
11 deconvolution programs to finely dissect the behavior of diverse immunological components,  
12 represents a reliable tool to readily capture the immunomodulating properties of anticancer  
13 therapies for designing scientifically-sound combination therapies. Thanks to this analysis we  
14 found that pazopanib has a strong immune modulatory effect peaking at the 3<sup>rd</sup> month of  
15 treatment and consists in relieved immunosuppression with enhanced cytotoxic T and NK  
16 mechanisms and IFN pathways. Taken together with the detrimental role of MDSCs in mRCC  
17 demonstrated in the TCGA cohort, these results provide a strong rationale for the use of TKIs  
18 as preconditioning strategy to improve immunological and clinical efficacy of immunotherapy  
19 in cancer patients.

20

## 21 **Materials and Methods**

### 22 **Patients and study description**

23 From January 2016 to June 2016 nine patients (8 males, 1 female) with metastatic clear cell  
24 RCC were treated with first line pazopanib as per clinical practice in Istituto Nazionale dei  
25 Tumori, Milan, Italy. Safety assessment included physical examination and laboratory tests  
26 every month. All patients had a good performance status (ECOG 0:8/9, ECOG 1: 1/9), a  
27 median age of 65 years and prevalence of intermediate risk according to Heng score (5/9).  
28 They received pazopanib at a standard dose of 800 mg orally once daily, continuously, for at

1 least 6 months. All patients signed an informed consent according to a protocol approved by  
2 the INT Ethical Committee [INT146/14].

3

#### 4 **Blood collection**

5 Blood samples (30 ml) were obtained from 9 patients at baseline (*Pre*), and at the 3<sup>rd</sup> and 6<sup>th</sup>  
6 month during therapy (*Post 3* and *Post 6*). For one single patient, samples were collected only  
7 at baseline and at 3 months therapy. Blood was processed within 1 hour from withdrawal.  
8 PBMCs were separated by Ficoll gradient (Leuco-sep tubes, ThermoFisher Scientific) and  
9 viable cells stored in liquid nitrogen until use, or frozen in Qiazole (Qiagen) for RNA extraction  
10 and gene expression profiling.

11

#### 12 **Transcriptomic analysis**

13 Suitable material for transcriptional analysis was available from 8 patients. RNA was extracted  
14 using miRNAeasy kit (Qiagen). After quality check and quantification by 2100 Bioanalyzer  
15 system (Agilent) and Nanodrop ND-1000 spectrophotometer (ThermoFisher), respectively,  
16 RNA expression was assessed using Illumina HT12v4 BeadChip. Illumina's BeadStudio  
17 version 1.9.0 software was used to generate signal intensity values from the scans. Data were  
18 further processed using the Bioconductor "Lumi" package. Following background correction  
19 and quantile normalization, expressions were log<sub>2</sub>-transformed for further analysis. Raw  
20 expression and normalized data matrix have been deposited at NCBI's Gene Expression  
21 Omnibus database (<http://www.ncbi.nlm.nih.gov/geo/>), with accession numbers GSE146163.  
22 From a total of 47,323 probes arrayed on the Illumina HT12v4 beadchip, the probes targeting  
23 multiple genes were collapsed (average expression intensity) and a final data matrix  
24 containing 12,913 unique genes was generated. Data analyses were performed using R  
25 (Version 1.0.44, RStudio Inc.) and Ingenuity Pathway Analysis (QIAGEN Bioinformatics). The  
26 comparison between each group (*Post 3 vs pre*, *Post 3 vs Post 6* and *Post 6 vs Pre*) was  
27 performed using the paired *t*-test. For detection of differentially expressed genes we used a *p*  
28 value cutoff of  $5 \times 10^{-3}$ , and false discovery rate (FDR) was provided as descriptive statistic

1 **(Supplementary Table 1)**, and not to dictate significance as the risk of type I error was  
2 mitigated by the use of orthogonal platforms (i.e., flow cytometry) for validation purposes.  
3 Hierarchical clustering was performed using the function “Heatmap” from the R package  
4 “ComplexHeatmap” [66]. Euclidean distance and complete linkage methods were used by  
5 default. Principle component analysis (PCA) was performed using the R function  
6 “scatterplot3d” package. The first three principal components, PC1, PC2 and PC3, were  
7 plotted against each other.

8

9 *Pathway analysis.* Gene ontology analyses were performed using Ingenuity Pathway Analysis  
10 (QIAGEN Bioinformatics). A relaxed  $p$  value cut-off of 0.05 was used to select transcripts for  
11 pathway analysis. The proportion of upregulated and downregulated transcripts was  
12 represented. The z-score was used to indicate the direction of pathway deregulation.  
13 Transcripts from the top three pathways in each comparison group were plotted in the  
14 corresponding heatmaps.

15

16 *Leucocyte subset estimations.* To estimate the enrichment of various cell types, gene  
17 expression deconvolution analyses were performed with ssGSEA [1, 2] implemented in the  
18 “GSVA package” using cell-specific signatures (**Supplementary Table 3**): T cells, CD8 T  
19 cells, cytotoxic T cells, T helper 1 cells (Th1 cells), central memory T cells (Tcm), effector  
20 memory T cells (Tem), T helper cells, T follicular helper cells (Tfh), Th2 cells, Th17 cells,  
21 gamma delta T cells (Tgd), natural killer cells (NK cells), NK CD56<sup>dim</sup>, NK CD56<sup>bright</sup> cells, B  
22 cells, neutrophils, eosinophils, mast cells [67], regulatory T cells (Treg), NKT cells, monocytes,  
23 dendritic cells (DC), immature DCs (iDC), plasmacytoid DCs (pDC), myeloid DCs (mDC) [44].  
24 For MDSCs, we constructed a specific signature based on 25 genes highly correlated in the  
25 present dataset, selected from the top 100 genes upregulated in extracellular vesicle (EV)-  
26 MDSCs vs monocytes (MDSC\_INT, **Supplementary Figure 4**) in our recent work [46].  
27 Additional MDSC signatures include the one proposed by Angelova *et al.* [44] (MDSC\_Angel),  
28 based on markers selected according to the literature, and a granulocytic myeloid-derived



1 suppressor cell (G-MDSC) signature defined by comparing G-MDSC vs naïve neutrophils [45].  
2 Forest plots were plotted by using mean enrichment scores (ESs) ratio between *Post 3 vs*  
3 *Pre*, *Post 6 vs Post 3* and *Post 6 vs Pre*. Differentially expressed ESs between pre-treatment  
4 and post-treatment were calculated through paired *t*-test ( $p < 0.05$ ).  
5  
6 *Modular repertoire analysis*. A set of 260 modules (co-expressed genes) was used for the  
7 analysis of this data set. This fixed modular repertoire was a priori determined, being  
8 constructed based on co-expression measured across 9 reference datasets encompassing a  
9 wide range of diseases (infectious, autoimmune, inflammatory) [17, 18, 68]  
10 ([https://github.com/Drinchai/DC\\_Module\\_Generation2](https://github.com/Drinchai/DC_Module_Generation2)). This data-driven approach allowed  
11 the capture of a broad repertoire of immune perturbations which were subsequently subjected  
12 to functional interpretation. This collection of annotated modules was then used as a  
13 framework for analysis and interpretation of our blood transcriptome dataset. The approach  
14 used for the construction, annotation and reuse of modular blood transcriptome repertoires  
15 was previously reported [14, 15, 17, 18, 68]. After normalization, raw expression intensity was  
16 used for the module analysis. Briefly, data was transformed from gene level data into module  
17 (M) level activity scores, both for group comparison (*Post 3 vs Pre*, *Post 6 vs Post 3* and *Post*  
18 *6 vs Pre*) and individual patients comparison at each time point. The modules defined by this  
19 approach (M1–M9, a total of 260 modules) were used as a framework to analyze and interpret  
20 this dataset. For group comparisons, the expression profile at each time point was calculated  
21 as a FC relative to a mean expression of all samples within that time points. Then, paired *t*-  
22 test was used to evaluate each time point comparison. If the FC between each group  
23 comparison was greater than 1, and the  $p$  value  $< 0.05$ , the transcript was considered as  
24 upregulated. If the FC between each group comparison was less than 1, and the  $p$  value  $<$   
25 0.05, it was considered as downregulated. Then the percentages of “module responsiveness”  
26 were calculated for each module. For individual comparison, the expression profile for each  
27 individual patient was calculated as a FC and difference relative to the expression of individual  
28 samples at each time point. If the FC between each time point comparison was more than 1,

1 and difference more than 10, the transcript was considered as upregulated. If the FC between  
2 each time point comparison was less than 1, and the difference less than 10, it was considered  
3 as downregulated. For both, group and individual comparisons, the “module-level” data is  
4 subsequently expressed as a percent value representing the proportion of differentially  
5 regulated transcripts for a given module. A module was considered to be responsive when  
6 more than 15% of the transcripts were down or upregulated.

7

### 8 **Multiparameter flow cytometry**

9 PBMC samples from 9 patients were thawed and tested simultaneously for all time points by  
10 flow cytometry. Phenotypic profiling was performed after labeling PBMCs with monoclonal  
11 fluorochrome-conjugated antibodies: CD14 FITC (Clone M5E2, BD Pharmingen), CD3 FITC  
12 (Clone UCHT1, BD Biosciences) or KO525 (Clone UCHT1, Beckman Coulter), PD-1 APC  
13 (Clone MIH4, BD Pharmingen) or PC7 (Clone PD1.3, Beckman Coulter), HLA-DR APC (Clone  
14 G46-6, BD Pharmingen), CD15 PerCP-CY5.5 (Clone HI98, BD Pharmingen), PD-L1 PE  
15 (Clone MIH1, BD Pharmingen), CD4 PE (Clone RPA-T4, BD Pharmingen), CD25 PerCP-  
16 Cy5.5 (Clone M-A251, BD Pharmingen), CD56 ALEXA750 (Clone N901, Beckman Coulter),  
17 CD16 BV650 (Clone 3G8, BD Biosciences), Live/Dead Fixable Violet (ThermoFisher), FOXP3  
18 APC (Clone FJK-16s eBioscience) used after cell permeabilization with the kit Perm Buffer  
19 (10X) and Fix/Perm Buffer (4X) (BioLegend), according to manufacturer’s instructions.  
20 Samples were incubated with Fc blocking reagent (Miltenyi Biotec) for 10 minutes at room  
21 temperature before the addition of monoclonal antibodies for 30 minutes at 4°C. Thereafter,  
22 samples were washed, fixed acquired by Gallios Beckman Coulter FC 500 or BD FACSCalibur  
23 (BD Biosciences) flow cytometers, and analyzed with Kaluza software (Beckman Coulter).  
24 Gating strategies are depicted in **Supplementary Figure 5**. Distinct cell subsets were  
25 quantified in terms of frequency rather than absolute numbers, since the latter are influenced  
26 by sampling manipulation procedures that are unrelated to biological patterns. Pre-treatment  
27 and post-treatment samples (*Post 3 vs Pre*, *Post 6 vs Post 3* and *Post 6 vs Pre*) were  
28 compared by using paired *t*-test.

## 1 **TCGA transcriptomic Analysis**

2 RNA-seq data from TCGA clear cell RCC (KIRC) cohort were downloaded using TCGA  
3 Assembler (v2.0.3). Data normalization was performed within lanes, and between lanes using  
4 R package EDASeq (v2.12.0) and quantile normalized using preprocessCore (v1.36.0). A  
5 single primary tumor sample was included per patient using the TCGA Assembler  
6 “ExtractTissueSpecificSamples” function. Previously flagged samples that did not pass assay-  
7 specific QCs were excluded [69]. Data was log<sub>2</sub> transformed with an (+1) offset. Enrichment  
8 scores (ES) were calculated by ssGSEA on the log<sub>2</sub> transformed, normalized gene-level data.  
9 Gene sets to define ES of tumor-associated pathways (n=51) were used as described  
10 previously [70]. The correlation between tumor-associated signatures was calculated using  
11 Pearson test and plotted using “corrplot” (v0.84).

12

## 13 **Survival Analysis**

14 Clinical data from the TCGA-KIRC cohort was obtained from the TCGA Pan-Cancer Clinical  
15 Data Resource [71]. Patients were divided in tertiles based on enrichment scores of MDSC  
16 gene signatures (MDSC\_INT, G-MDSC, and MDSC\_Angel). Overall survival (OS) was used  
17 to generate Kaplan-Meier curves using a modified version of the ggkm function [72]. Survival  
18 data were censored after a follow-up period of 10 years. Hazards ratios (HR) between groups,  
19 corresponding *p* values, and confidence intervals were calculated using cox proportional  
20 hazard regression with R package survival (v2.41-3).

21

## 22 **Competing interests**

23 EV reports personal fees for advisory boards from Pfizer, Ipsen, Novartis outside of the  
24 submitted work. No potential conflicts of interest were disclosed by the other authors.

25

## 26 **Acknowledgements**

27 This work was supported by the Associazione Italiana per la Ricerca sul Cancro (AIRC)  
28 Special Program Innovative Tools for Cancer Risk Assessment and early Diagnosis 5X1000

1 (no. 12162 to LR) and by Fondi 5x1000 Ministero della Salute 2015 (D/17/1VH to VH) and by  
2 the Italian Ministry of Health (RF-2016-02363001 to G.P.). We would like to thank the patients  
3 and participating study team for making this study happen. DB, DR, and DC work has been  
4 supported by Sidra Medicine, Member of Qatar Foundation.

5

## 6 **References;**

- 7 1. Romano A, Parrinello NL, Chiarenza A, Motta G, Tibullo D, Giallongo C, et al. Immune off-  
8 target effects of Brentuximab Vedotin in relapsed/refractory Hodgkin Lymphoma. *Br J*  
9 *Haematol.* 2019;185:468–79.
- 10 2. Weiss T, Weller M, Roth P. Immunological effects of chemotherapy and radiotherapy  
11 against brain tumors. *Expert Rev Anticancer Ther.* 2016;16:1087–94.
- 12 3. Galluzzi L, Buqué A, Kepp O, Zitvogel L, Kroemer G. Immunogenic cell death in cancer and  
13 infectious disease. *Nat Rev Immunol.* 2017;17:97–111.
- 14 4. Wei SC, Duffy CR, Allison JP. Fundamental Mechanisms of Immune Checkpoint Blockade  
15 Therapy. *Cancer Discov.* 2018;8:1069–86.
- 16 5. Gandhi L, Rodríguez-Abreu D, Gadgeel S, Esteban E, Felip E, De Angelis F, et al.  
17 Pembrolizumab plus Chemotherapy in Metastatic Non-Small-Cell Lung Cancer. *N Engl J Med.*  
18 2018;378:2078–92.
- 19 6. Schmid P, Cortes J, Pusztai L, McArthur H, Kümmel S, Bergh J, et al. Pembrolizumab for  
20 Early Triple-Negative Breast Cancer. *New England Journal of Medicine.* 2020;382:810–21.
- 21 7. Schmid P, Adams S, Rugo HS, Schneeweiss A, Barrios CH, Iwata H, et al. Atezolizumab  
22 and Nab-Paclitaxel in Advanced Triple-Negative Breast Cancer. *New England Journal of*  
23 *Medicine.* 2018;379:2108–21.
- 24 8. Ostrand-Rosenberg S, Fenselau C. Myeloid-Derived Suppressor Cells: Immune-  
25 Suppressive Cells That Impair Antitumor Immunity and Are Sculpted by Their Environment. *J*  
26 *Immunol.* 2018;200:422–31.
- 27 9. Yue P, Harper T, Bacot SM, Chowdhury M, Lee S, Akue A, et al. BRAF and MEK inhibitors  
28 differentially affect nivolumab-induced T cell activation by modulating the TCR and AKT  
29 signaling pathways. *Oncol Immunology.* 2019;8:e1512456.
- 30 10. Bedognetti D, Roelands J, Decock J, Wang E, Hendrickx W. The MAPK hypothesis:  
31 immune-regulatory effects of MAPK-pathway genetic dysregulations and implications for  
32 breast cancer immunotherapy. *Emerging Topics in Life Sciences.* 2017;1:429–45.
- 33 11. Dushyanthen S, Teo ZL, Caramia F, Savas P, Mintoff CP, Virassamy B, et al. Agonist  
34 immunotherapy restores T cell function following MEK inhibition improving efficacy in breast  
35 cancer. *Nat Commun.* 2017;8:606.
- 36 12. Gu Y, Zhao W, Meng F, Qu B, Zhu X, Sun Y, et al. Sunitinib impairs the proliferation and  
37 function of human peripheral T cell and prevents T-cell-mediated immune response in mice.  
38 *Clin Immunol.* 2010;135:55–62.

- 1 13. Hasin Y, Seldin M, Lusic A. Multi-omics approaches to disease. *Genome Biology*.  
2 2017;18:83.
- 3 14. Chaussabel D, Pulendran B. A vision and a prescription for big data-enabled medicine.  
4 *Nat Immunol*. 2015;16:435–9.
- 5 15. Chaussabel D, Baldwin N. Democratizing Systems Immunology with Modular  
6 Transcriptional Repertoires Analyses. *Nat Rev Immunol*. 2014;14:271–80.
- 7 16. Pascual V, Chaussabel D, Banchereau J. A genomic approach to human autoimmune  
8 diseases. *Annu Rev Immunol*. 2010;28:535–71.
- 9 17. Obermoser G, Presnell S, Domico K, Xu H, Wang Y, Anguiano E, et al. Systems scale  
10 interactive exploration reveals quantitative and qualitative differences in response to influenza  
11 and pneumococcal vaccines. *Immunity*. 2013;38:831–44.
- 12 18. Singhanian A, Graham CM, Gabryšová L, Moreira-Teixeira L, Stavropoulos E, Pitt JM, et  
13 al. Transcriptional profiling unveils type I and II interferon networks in blood and tissues across  
14 diseases. *Nat Commun*. 2019;10:2887.
- 15 19. HIPC-CHI Signatures Project Team, HIPC-I Consortium. Multicohort analysis reveals  
16 baseline transcriptional predictors of influenza vaccination responses. *Sci Immunol*. 2017;2.
- 17 20. Zhai Y, Franco LM, Atmar RL, Quarles JM, Arden N, Bucasas KL, et al. Host  
18 Transcriptional Response to Influenza and Other Acute Respiratory Viral Infections – A  
19 Prospective Cohort Study. *PLOS Pathogens*. 2015;11:e1004869.
- 20 21. Rinchai D, Presnell S, Vidal M, Dutta S, Chauhan V, Cavanagh D, et al. Blood Interferon  
21 Signatures Putatively Link Lack of Protection Conferred by the RTS,S Recombinant Malaria  
22 Vaccine to an Antigen-specific IgE Response. *F1000Res*. 2015;4:919.
- 23 22. Mahajan P, Kuppermann N, Mejias A, Suarez N, Chaussabel D, Casper TC, et al.  
24 Association of RNA Biosignatures With Bacterial Infections in Febrile Infants Aged 60 Days or  
25 Younger. *JAMA*. 2016;316:846–57.
- 26 23. Butterfield LH, Disis ML, Fox BA, Kaufman DR, Khleif SN, Wang E, et al. SITC 2018  
27 workshop report: Immuno-Oncology Biomarkers: State of the Art. *J Immunother Cancer*.  
28 2018;6:138.
- 29 24. Bedognetti D, Wang E, Sertoli MR, Marincola FM. Gene expression profiling in vaccine  
30 therapy and immunotherapy for cancer. *Expert Rev Vaccines*. 2010;9:555–65.
- 31 25. Panelli MC, Wang E, Phan G, Puhlmann M, Miller L, Ohnmacht GA, et al. Gene-expression  
32 profiling of the response of peripheral blood mononuclear cells and melanoma metastases to  
33 systemic IL-2 administration. *Genome Biol*. 2002;3:RESEARCH0035.
- 34 26. Weiss GR, Grosh WW, Chianese-Bullock KA, Zhao Y, Liu H, Slingluff CL, et al. Molecular  
35 insights on the peripheral and intra-tumoral effects of systemic high dose rIL-2 (Aldesleukin)  
36 administration for the treatment of metastatic melanoma. *Clin Cancer Res*. 2011;17:7440–50.
- 37 27. Friedlander P, Wassmann K, Christenfeld AM, Fisher D, Kyi C, Kirkwood JM, et al. Whole-  
38 blood RNA transcript-based models can predict clinical response in two large independent  
39 clinical studies of patients with advanced melanoma treated with the checkpoint inhibitor,  
40 tremelimumab. *J Immunother Cancer*. 2017;5:67.

- 1 28. 34th Annual Meeting & Pre-Conference Programs of the Society for Immunotherapy of  
2 Cancer (SITC 2019): part 1. *J Immunother Cancer*. 2019;7 Suppl 1. doi:10.1186/s40425-019-  
3 0763-1.
- 4 29. Motzer RJ, Tannir NM, McDermott DF, Arén Frontera O, Melichar B, Choueiri TK, et al.  
5 Nivolumab plus Ipilimumab versus Sunitinib in Advanced Renal-Cell Carcinoma. *New England*  
6 *Journal of Medicine*. 2018;378:1277–90.
- 7 30. Motzer RJ, Rini BI, McDermott DF, Arén Frontera O, Hammers HJ, Carducci MA, et al.  
8 Nivolumab plus ipilimumab versus sunitinib in first-line treatment for advanced renal cell  
9 carcinoma: extended follow-up of efficacy and safety results from a randomised, controlled,  
10 phase 3 trial. *Lancet Oncol*. 2019;20:1370–85.
- 11 31. Rini BI, Battle D, Figlin RA, George DJ, Hammers H, Hutson T, et al. The society for  
12 immunotherapy of cancer consensus statement on immunotherapy for the treatment of  
13 advanced renal cell carcinoma (RCC). *J Immunother Cancer*. 2019;7:354.
- 14 32. Escudier B, Sharma P, McDermott DF, George S, Hammers HJ, Srinivas S, et al.  
15 CheckMate 025 Randomized Phase 3 Study: Outcomes by Key Baseline Factors and Prior  
16 Therapy for Nivolumab Versus Everolimus in Advanced Renal Cell Carcinoma. *Eur Urol*.  
17 2017;72:962–71.
- 18 33. Labrousse-Arias D, Martínez-Alonso E, Corral-Escariz M, Bienes-Martínez R, Berridy J,  
19 Serrano-Oviedo L, et al. VHL promotes immune response against renal cell carcinoma via  
20 NF- $\kappa$ B-dependent regulation of VCAM-1. *J Cell Biol*. 2017;216:835–47.
- 21 34. Jászai J, Schmidt MHH. Trends and Challenges in Tumor Anti-Angiogenic Therapies.  
22 *Cells*. 2019;8. doi:10.3390/cells8091102.
- 23 35. Niu G, Chen X. Vascular Endothelial Growth Factor as an Anti-angiogenic Target for  
24 Cancer Therapy. *Curr Drug Targets*. 2010;11:1000–17.
- 25 36. Gril B, Palmieri D, Qian Y, Smart D, Ileva L, Liewehr DJ, et al. Pazopanib reveals a role  
26 for tumor cell B-Raf in the prevention of HER2+ breast cancer brain metastasis. *Clin Cancer*  
27 *Res*. 2011;17:142–53.
- 28 37. Sternberg CN, Davis ID, Mardiak J, Szczylik C, Lee E, Wagstaff J, et al. Pazopanib in  
29 locally advanced or metastatic renal cell carcinoma: results of a randomized phase III trial. *J*  
30 *Clin Oncol*. 2010;28:1061–8.
- 31 38. van der Graaf WTA, Blay J-Y, Chawla SP, Kim D-W, Bui-Nguyen B, Casali PG, et al.  
32 Pazopanib for metastatic soft-tissue sarcoma (PALETTE): a randomised, double-blind,  
33 placebo-controlled phase 3 trial. *Lancet*. 2012;379:1879–86.
- 34 39. Stoeckle C, Gouttefangeas C, Hammer M, Weber E, Melms A, Tolosa E. Cathepsin W  
35 expressed exclusively in CD8+ T cells and NK cells, is secreted during target cell killing but is  
36 not essential for cytotoxicity in human CTLs. *Exp Hematol*. 2009;37:266–75.
- 37 40. Gros A, Parkhurst MR, Tran E, Pasetto A, Robbins PF, Ilyas S, et al. Prospective  
38 identification of neoantigen-specific lymphocytes in the peripheral blood of melanoma patients.  
39 *Nat Med*. 2016;22:433–8.
- 40 41. Mariotti FR, Petrini S, Ingegnere T, Tumino N, Besi F, Scordamaglia F, et al. PD-1 in  
41 human NK cells: evidence of cytoplasmic mRNA and protein expression. *Oncoimmunology*.  
42 2019;8:1557030.

- 1 42. Bronte V, Brandau S, Chen S-H, Colombo MP, Frey AB, Greten TF, et al.  
2 Recommendations for myeloid-derived suppressor cell nomenclature and characterization  
3 standards. *Nat Commun.* 2016;7:12150.
- 4 43. Pan T, Zhou T, Li L, Liu Z, Chen Y, Mao E, et al. Monocyte programmed death ligand-1  
5 expression is an early marker for predicting infectious complications in acute pancreatitis. *Crit*  
6 *Care.* 2017;21:186.
- 7 44. Angelova M, Charoentong P, Hackl H, Fischer ML, Snajder R, Krogsdam AM, et al.  
8 Characterization of the immunophenotypes and antigenomes of colorectal cancers reveals  
9 distinct tumor escape mechanisms and novel targets for immunotherapy. *Genome Biol.*  
10 2015;16. doi:10.1186/s13059-015-0620-6.
- 11 45. Fridlender ZG, Sun J, Mishalian I, Singhal S, Cheng G, Kapoor V, et al. Transcriptomic  
12 Analysis Comparing Tumor-Associated Neutrophils with Granulocytic Myeloid-Derived  
13 Suppressor Cells and Normal Neutrophils. *PLoS One.* 2012;7.  
14 doi:10.1371/journal.pone.0031524.
- 15 46. Huber V, Vallacchi V, Fleming V, Hu X, Cova A, Dugo M, et al. Tumor-derived microRNAs  
16 induce myeloid suppressor cells and predict immunotherapy resistance in melanoma. *J Clin*  
17 *Invest.* 2018.
- 18 47. Valenti R, Huber V, Filipazzi P, Pilla L, Sovena G, Villa A, et al. Human tumor-released  
19 microvesicles promote the differentiation of myeloid cells with transforming growth factor-beta-  
20 mediated suppressive activity on T lymphocytes. *Cancer Res.* 2006;66:9290–8.
- 21 48. Filipazzi P, Valenti R, Huber V, Pilla L, Canese P, Iero M, et al. Identification of a new  
22 subset of myeloid suppressor cells in peripheral blood of melanoma patients with modulation  
23 by a granulocyte-macrophage colony-stimulation factor-based antitumor vaccine. *J Clin*  
24 *Oncol.* 2007;25:2546–53.
- 25 49. Stehle F, Schulz K, Fahldieck C, Kalich J, Lichtenfels R, Riemann D, et al. Reduced  
26 immunosuppressive properties of axitinib in comparison with other tyrosine kinase inhibitors.  
27 *J Biol Chem.* 2013;288:16334–47.
- 28 50. Kusmartsev S, Eruslanov E, Kübler H, Tseng T, Sakai Y, Su Z, et al. Oxidative stress  
29 regulates expression of VEGFR1 in myeloid cells: link to tumor-induced immune suppression  
30 in renal cell carcinoma. *J Immunol.* 2008;181:346–53.
- 31 51. Yang J, Yan J, Liu B. Targeting VEGF/VEGFR to Modulate Antitumor Immunity. *Front*  
32 *Immunol.* 2018;9. doi:10.3389/fimmu.2018.00978.
- 33 52. Zizzari IG, Napoletano C, Botticelli A, Caponnetto S, Calabrò F, Gelibter A, et al. TK  
34 Inhibitor Pazopanib Primes DCs by Downregulation of the  $\beta$ -Catenin Pathway. *Cancer*  
35 *Immunol Res.* 2018;6:711–22.
- 36 53. Morelli MB, Amantini C, Santoni M, Soriani A, Nabissi M, Cardinali C, et al. Axitinib induces  
37 DNA damage response leading to senescence, mitotic catastrophe, and increased NK cell  
38 recognition in human renal carcinoma cells. *Oncotarget.* 2015;6:36245–59.
- 39 54. van Crujisen H, van der Veldt AAM, Vrolijk L, Oosterhoff D, Broxterman HJ, Scheper RJ,  
40 et al. Sunitinib-induced myeloid lineage redistribution in renal cell cancer patients: CD1c+  
41 dendritic cell frequency predicts progression-free survival. *Clin Cancer Res.* 2008;14:5884–  
42 92.

- 1 55. Ko JS, Zea AH, Rini BI, Ireland JL, Elson P, Cohen P, et al. Sunitinib mediates reversal of  
2 myeloid-derived suppressor cell accumulation in renal cell carcinoma patients. *Clin Cancer*  
3 *Res.* 2009;15:2148–57.
- 4 56. Finke JH, Rini B, Ireland J, Rayman P, Richmond A, Golshayan A, et al. Sunitinib reverses  
5 type-1 immune suppression and decreases T-regulatory cells in renal cell carcinoma patients.  
6 *Clin Cancer Res.* 2008;14:6674–82.
- 7 57. Adotevi O, Pere H, Ravel P, Haicheur N, Badoual C, Merillon N, et al. A decrease of  
8 regulatory T cells correlates with overall survival after sunitinib-based antiangiogenic therapy  
9 in metastatic renal cancer patients. *J Immunother.* 2010;33:991–8.
- 10 58. Pal SK, Hossain DMS, Zhang Q, Frankel PH, Jones JO, Carmichael C, et al. Pazopanib  
11 as third line therapy for metastatic renal cell carcinoma: clinical efficacy and temporal analysis  
12 of cytokine profile. *J Urol.* 2015;193:1114–21.
- 13 59. Amin A, Plimack ER, Ernstoff MS, Lewis LD, Bauer TM, McDermott DF, et al. Safety and  
14 efficacy of nivolumab in combination with sunitinib or pazopanib in advanced or metastatic  
15 renal cell carcinoma: the CheckMate 016 study. *J Immunother Cancer.* 2018;6:109.
- 16 60. Rini BI, Powles T, Atkins MB, Escudier B, McDermott DF, Suarez C, et al. Atezolizumab  
17 plus bevacizumab versus sunitinib in patients with previously untreated metastatic renal cell  
18 carcinoma (IMmotion151): a multicentre, open-label, phase 3, randomised controlled trial.  
19 *Lancet.* 2019;393:2404–15.
- 20 61. Rini BI, Plimack ER, Stus V, Gafanov R, Hawkins R, Nosov D, et al. Pembrolizumab plus  
21 Axitinib versus Sunitinib for Advanced Renal-Cell Carcinoma. *N Engl J Med.* 2019;380:1116–  
22 27.
- 23 62. Motzer RJ, Penkov K, Haanen J, Rini B, Albiges L, Campbell MT, et al. Avelumab plus  
24 Axitinib versus Sunitinib for Advanced Renal-Cell Carcinoma. *N Engl J Med.* 2019;380:1103–  
25 15.
- 26 63. Alonso-Gordoa T, García-Bermejo ML, Grande E, Garrido P, Carrato A, Molina-Cerrillo J.  
27 Targeting Tyrosine kinases in Renal Cell Carcinoma: “New Bullets against Old Guys.” *Int J*  
28 *Mol Sci.* 2019;20.
- 29 64. Schlemmer M, Spek A, Rodler S, Schott M, Casuscelli J, Staehler M. Sequential Treatment  
30 Based on Sunitinib and Sorafenib in Patients with Metastatic Renal Cell Carcinoma. *Cureus.*  
31 2019;11:e4244.
- 32 65. Fukumura D, Kloepper J, Amoozgar Z, Duda DG, Jain RK. Enhancing cancer  
33 immunotherapy using antiangiogenics: opportunities and challenges. *Nat Rev Clin Oncol.*  
34 2018;15:325–40.
- 35 66. Gu Z, Eils R, Schlesner M. Complex heatmaps reveal patterns and correlations in  
36 multidimensional genomic data. *Bioinformatics.* 2016;32:2847–9.
- 37 67. Bindea G, Mlecnik B, Tosolini M, Kirilovsky A, Waldner M, Obenauf AC, et al.  
38 Spatiotemporal dynamics of intratumoral immune cells reveal the immune landscape in human  
39 cancer. *Immunity.* 2013;39:782–95.
- 40 68. Chaussabel D, Quinn C, Shen J, Patel P, Glaser C, Baldwin N, et al. A modular analysis  
41 framework for blood genomics studies: application to systemic lupus erythematosus.  
42 *Immunity.* 2008;29:150–64.



- 1 69. Thorsson V, Gibbs DL, Brown SD, Wolf D, Bortone DS, Ou Yang T-H, et al. The Immune  
2 Landscape of Cancer. *Immunity*. 2018;48:812-830.e14.
- 3 70. Roelands J, Hendrickx W, Kuppen PJK, Mall R, Zoppoli G, Saad M, et al. Genomic  
4 landscape of tumor-host interactions with differential prognostic and predictive connotations.  
5 *bioRxiv*. 2019;:546069.
- 6 71. Liu J, Lichtenberg T, Hoadley KA, Poisson LM, Lazar AJ, Cherniack AD, et al. An  
7 Integrated TCGA Pan-Cancer Clinical Data Resource to Drive High-Quality Survival Outcome  
8 Analytics. *Cell*. 2018;173:400-416.e11.
- 9 72. Abhijit. Stat Bandit. <https://statbandit.wordpress.com/author/aikiadg/>. Accessed 18 Apr  
10 2020.
- 11

1 **Table 1:** Top 40 of differentially expressed between post-treatment 3 months vs pre-treatment

| Symbol  | Gene name                                          | P-value | log2FC |
|---------|----------------------------------------------------|---------|--------|
| GZMB    | granzyme B                                         | 0.00169 | 0.726  |
| KLRD1   | killer cell lectin like receptor D1                | 0.00192 | 0.651  |
| GNLY    | granulysin                                         | 0.00029 | 0.649  |
| KLRF1   | killer cell lectin like receptor F1                | 0.00308 | 0.648  |
| PRF1    | perforin 1                                         | 0.00461 | 0.646  |
| CLIC3   | chloride intracellular channel 3                   | 0.00150 | 0.637  |
| KIR2DL3 | killer cell immunoglobulin like receptor, two Ig   | 0.00060 | 0.630  |
| GZMH    | granzyme H                                         | 0.00394 | 0.616  |
| NKG7    | natural killer cell granule protein 7              | 0.00137 | 0.601  |
| KIR2DL4 | killer cell immunoglobulin like receptor, two Ig   | 0.00194 | 0.570  |
| CST7    | cystatin F                                         | 0.00140 | 0.564  |
| CTSW    | cathepsin W                                        | 0.00072 | 0.556  |
| KIR2DL1 | killer cell immunoglobulin like receptor, two Ig   | 0.00097 | 0.525  |
| KIR3DL1 | killer cell immunoglobulin like receptor, three Ig | 0.00077 | 0.507  |
| CD160   | CD160 molecule                                     | 0.00001 | 0.461  |
| KIR3DL2 | killer cell immunoglobulin like receptor, three Ig | 0.00044 | 0.461  |
| RNF165  | ring finger protein 165                            | 0.00081 | 0.458  |
| TTC38   | tetratricopeptide repeat domain 38                 | 0.00058 | 0.447  |
| KIR2DS5 | killer cell immunoglobulin like receptor, two Ig   | 0.00126 | 0.431  |
| LAG3    | lymphocyte activating 3                            | 0.00004 | 0.427  |
| PYHIN1  | pyrin and HIN domain family member 1               | 0.00450 | 0.394  |
| SPON2   | spondin 2                                          | 0.00374 | 0.377  |
| HOXC4   | homeobox C4                                        | 0.00006 | 0.363  |
| PTGDR   | prostaglandin D2 receptor                          | 0.00059 | 0.362  |
| KLRC1   | killer cell lectin like receptor C1                | 0.00128 | 0.361  |
| IL18RAP | interleukin 18 receptor accessory protein          | 0.00240 | 0.358  |
| AGAP1   | ArfGAP with GTPase domain, ankyrin repeat and PH   | 0.00055 | 0.355  |
| NCR3    | natural cytotoxicity triggering receptor 3         | 0.00160 | 0.354  |
| CBLB    | Cbl proto-oncogene B                               | 0.00497 | 0.348  |
| NCAM1   | neural cell adhesion molecule 1                    | 0.00007 | 0.339  |
| TSEN54  | tRNA splicing endonuclease subunit 54              | 0.00068 | 0.339  |
| SDF2L1  | stromal cell derived factor 2 like 1               | 0.00118 | 0.339  |
| PDZD4   | PDZ domain containing 4                            | 0.00247 | 0.338  |
| PRSS30P | serine protease 30, pseudogene                     | 0.00237 | 0.334  |
| NMUR1   | neuromedin U receptor 1                            | 0.00020 | 0.329  |
| IFITM1  | interferon induced transmembrane protein 1         | 0.00223 | 0.328  |
| FKBP11  | FK506 binding protein 11                           | 0.00128 | 0.319  |
| KIR3DL3 | killer cell immunoglobulin like receptor, three Ig | 0.00152 | 0.318  |
| HOPX    | HOP homeobox                                       | 0.00217 | 0.310  |
| CD8A    | CD8a molecule                                      | 0.00348 | 0.304  |

2

3

4

5

1 **Figure legends**

2 **Figure 1: Transcriptional analysis of PBMCs from mRCC patients treated with**  
3 **pazopanib.** (A) Principle component analysis (PCA) of all patient samples color-coded by time  
4 of treatment (left) and individual patient (right). (B) Volcano plots of differentially expressed  
5 genes between pre- and post-treatment (*Post 3 vs Pre*, *Post 6 vs Post 3* and *Post 6 vs Pre*);  
6 the horizontal line represent cut off at  $p < 0.005$  and vertical lines represent fold-change  $> 1.2$   
7 (right) or  $< -1.2$  (left). (C) Violin and line plots of selected genes. The paired *t-test* was used  
8 for comparison of the expression levels of each gene between patient groups.

9

10 **Figure 2: Impact of pazopanib treatment on gene expression.** Top ten canonical pathways  
11 ranking modulated by treatment identified using IPA analysis according to significance level  
12 (*paired t-test*,  $p < 0.05$ ). (A) post-treatment 3 months (*Post 3*) vs baseline (*Pre*), (B) Post  
13 treatment 6 months (*Post 6*) vs *Post 3*, and (C) *Post 6 vs Pre*. (D) Top 3 pathways genes (as  
14 listed in IPA software) in each timepoint comparison were presented by heatmap on the right  
15 panels. The z-score was used to indicate the direction of the pathway activation.

16

17 **Figure 3: Modular mapping of changes in blood transcriptome elicited by pazopanib in**  
18 **mRCC patients.** Changes in transcript abundance measured in PBMCs using whole-genome  
19 arrays were mapped against a pre-constructed repertoire of co-expressed gene sets  
20 (modules). The proportion of transcripts for which abundance was significantly changed in  
21 comparison between samples collected at 3 months (*Post 3*) vs baseline (*Pre*), 6 months (*Post*  
22 *6*) vs 3 months (*Post 3*) and 6 months (*Post 6*) vs baseline (*Pre*) in each module. When the  
23 percentage of response exceeds 15 %, the module was considered as responsive to  
24 treatment. Responsive modules are mapped on a grid, the proportion of significant transcripts  
25 for each module is represented by a spot of color, with red representing increased abundance  
26 and blue representing decreased abundance. The degree of intensity of the spots denotes the  
27 percentage of transcripts in a given module showing significant difference in abundance in  
28 comparison to the baseline. A legend is provided with functional interpretations indicated at

1 each position of the grid by a color code. Functional interpretations are indicated by the color-  
2 coded grid at the bottom of the figure.

3

4 **Figure 4: Mapping perturbations of the modular repertoire across individual samples.**

5 Individual comparisons. Percentage of response of Individual patients at *Post 3 vs Pre* (blue),  
6 *Post 6 months vs Post 3 months* (yellow), and *Post 6 months vs Pre* (orange). The expression  
7 profile for each individual patient was calculated as a FC and difference relative to an  
8 expression of individual samples in each time point. For determining post-treatment changes  
9 for individual subjects, a cut-off is set against which individual genes constitutive of a module  
10 are tested ( $|FC| > 1$  and  $|difference| > 10$ ).

11

12 **Figure 5: Cell-type specific analysis in pre-treatment and post-treatment samples. (A)**

13 Forest plot of leukocyte enrichment score comparison between *Post 3 vs Pre*, *Post 6 vs Post*  
14 *3*, and *Post 6 vs Pre*. (B) Heatmap analysis of fold-change of leukocyte enrichment score; the  
15 fold change-scored values of representative fold-change between *Post 3 vs Pre*, *Post 6 vs*  
16 *Post 3*, and *Post 6 vs Pre* are displayed in a heatmap. (C) Violin plots and line charts of  
17 significant cell types. Red asterisks: \* =  $p < 0.05$ , \*\* =  $p < 0.01$ , \*\*\* =  $p < 0.001$ ; *ns* =  $p$  not  
18 significant.

19

20 **Figure 6: Flow cytometry analysis in samples with pre-treatment and post-treatment.**

21 (A) Forest plot of the ratio of cell-type proportions between *Post 3 vs Pre*, *Post 6 vs Post 3*,  
22 and *Post 6 vs Pre* analyzed by flow cytometry. (B) Heatmap analysis of fold-change of cell-  
23 type proportions; the z-scored values of representative fold-change between *Post 3 vs Pre*,  
24 *Post 6 vs Post 3*, and *Post 6 vs Pre* are displayed in a heatmap. (C) Violin plots and line chart  
25 of significant cell types. Red asterisks: \* =  $p < 0.05$ , \*\* =  $p < 0.01$ , \*\*\* =  $p < 0.001$ ; *ns* =  $p$  not  
26 significant.

27

1 **Figure 7: Prognostic implications of MDSC gene signature in kidney renal clear cell**  
2 **carcinoma (KIRC, n = 515).** (A) Kaplan Meier curves showing overall survival (OS) of patients  
3 within the highest tertile of MDSC\_INT enrichment versus the two lower tertiles (LowMed).  
4 Cox proportional hazards statistic are shown. (B) Boxplots of MDSC\_INT enrichment scores  
5 by AJCC pathologic stage (left) and histological grade (right). T-test: \* =  $p < 0.05$ , \*\* =  $p <$   
6  $0.01$ , \*\*\* =  $p < 0.001$ . C) Scatterplots showing the association between MDSC\_INT scores  
7 and the enrichment score (ES) of genes related to epithelial mesenchymal transition (upper),  
8 and angiogenesis (lower). Regression line with corresponding Pearson's correlation  
9 coefficient (R) and p-value are shown. (D) Pearson correlation matrix of enrichment scores of  
10 tumor-associated pathways. MDSC\_INT signature is indicated with a red square. (E)  
11 Univariate and multivariate overall survival Cox proportional hazards regression analysis  
12 including MDSC\_INT signature, pathologic stage (III&IV versus I&II), and histological grade  
13 (G3&G4 versus G1&G2).

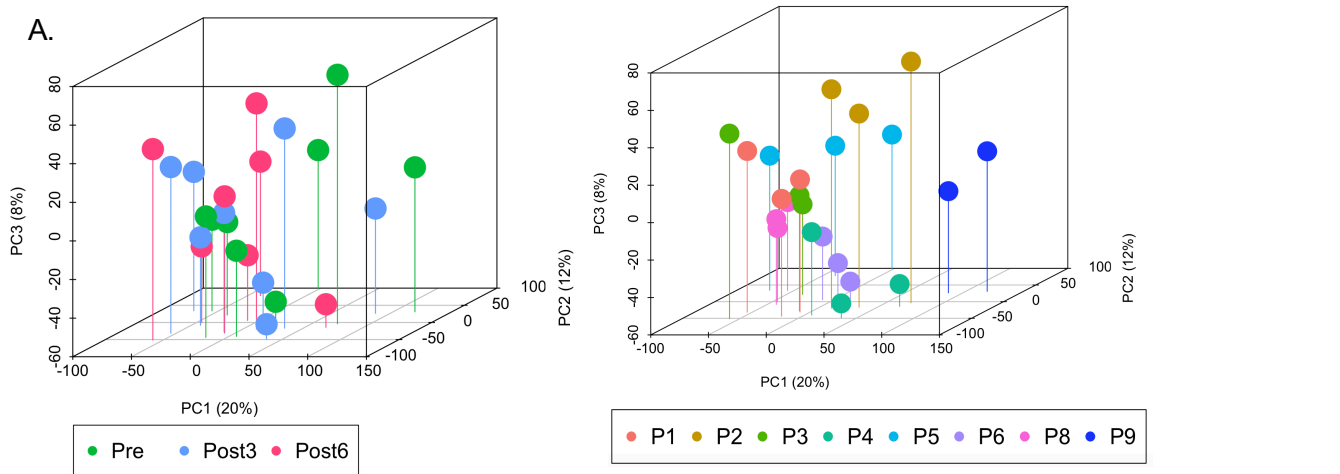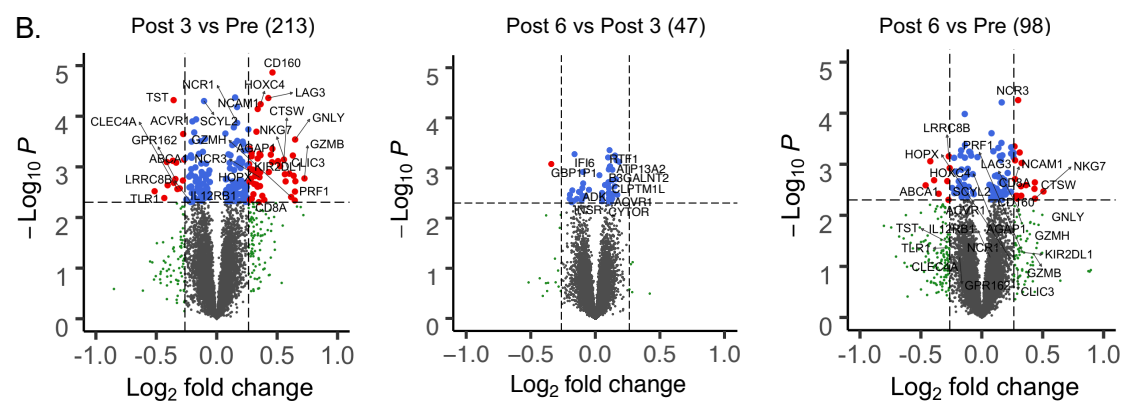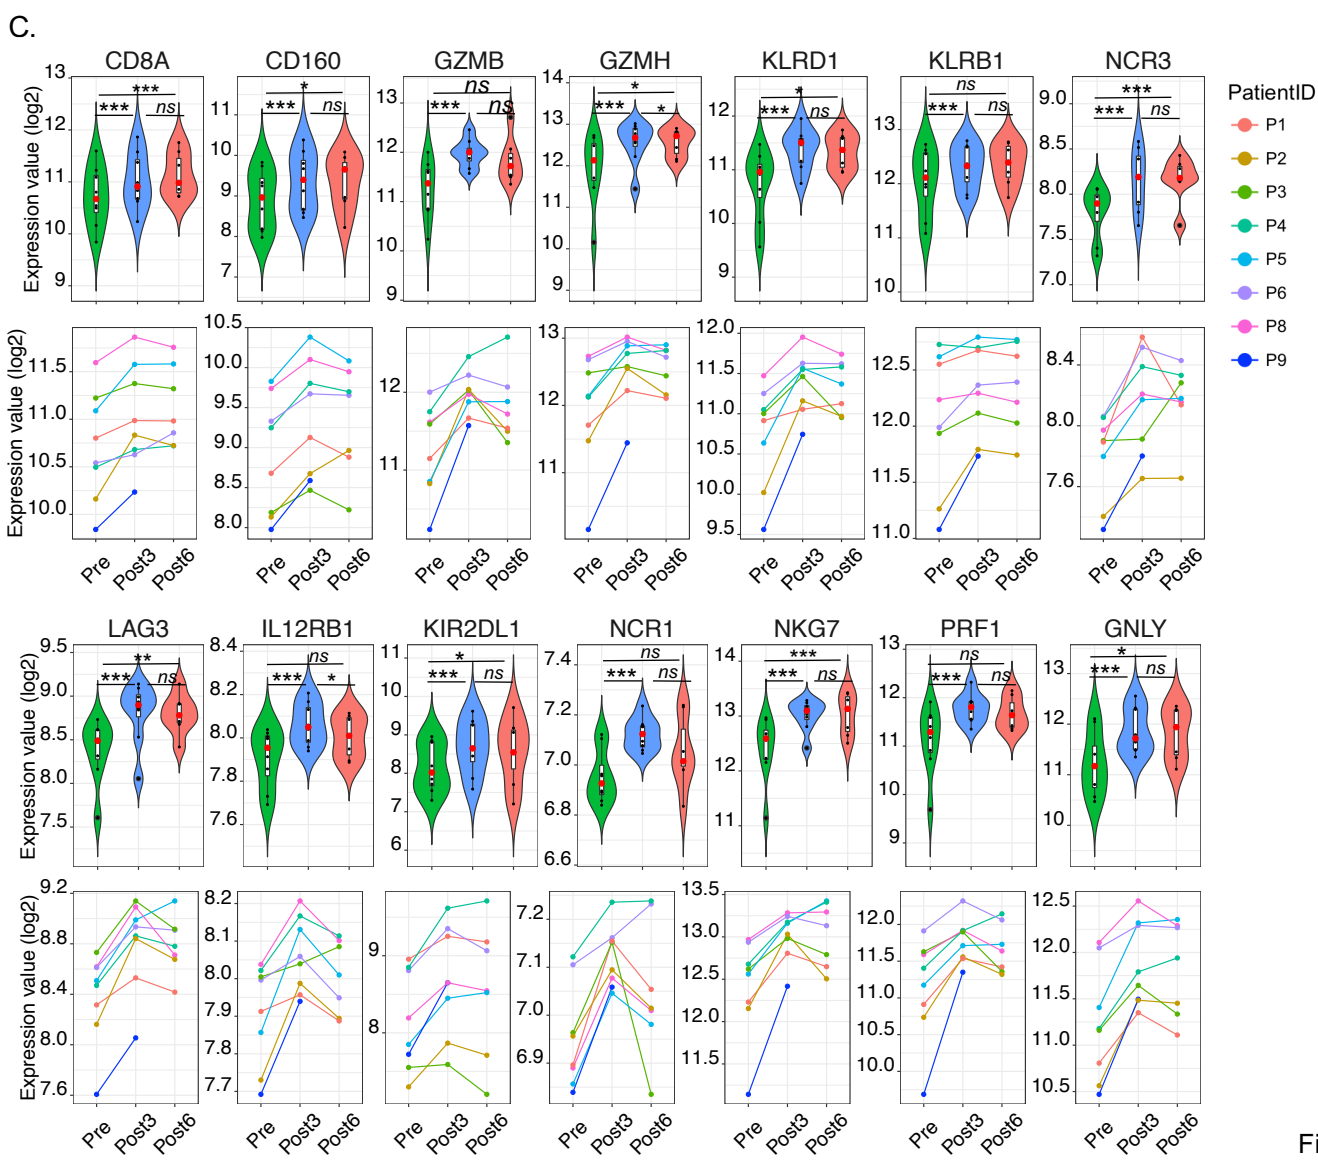

Figure 1

### A. Post 3 vs Pre

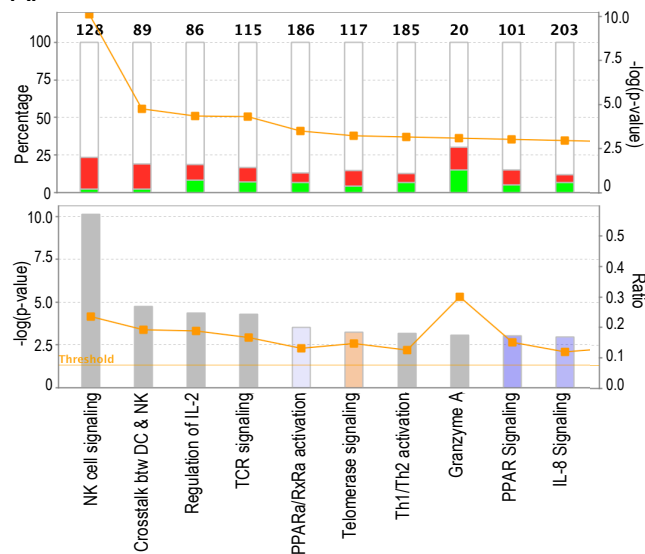

### B. Post 6 vs Post 3

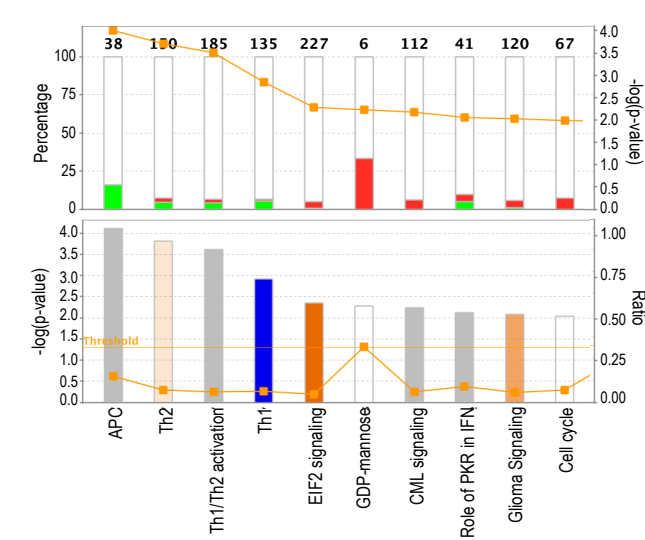

### C. Post 6 vs Pre

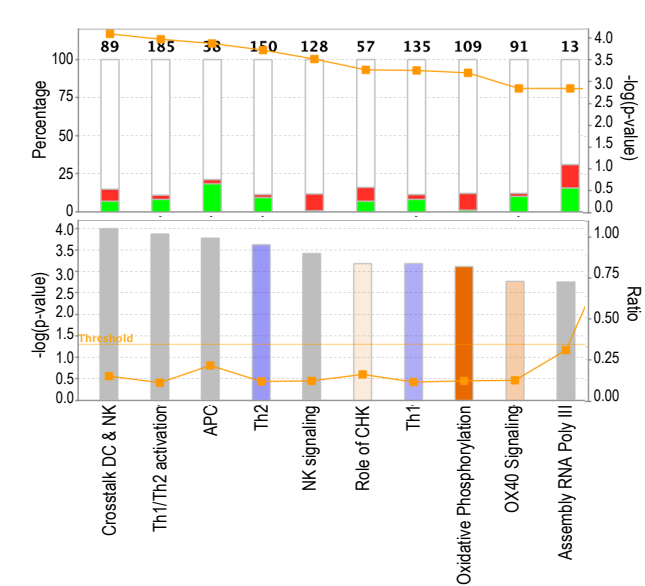

### D.

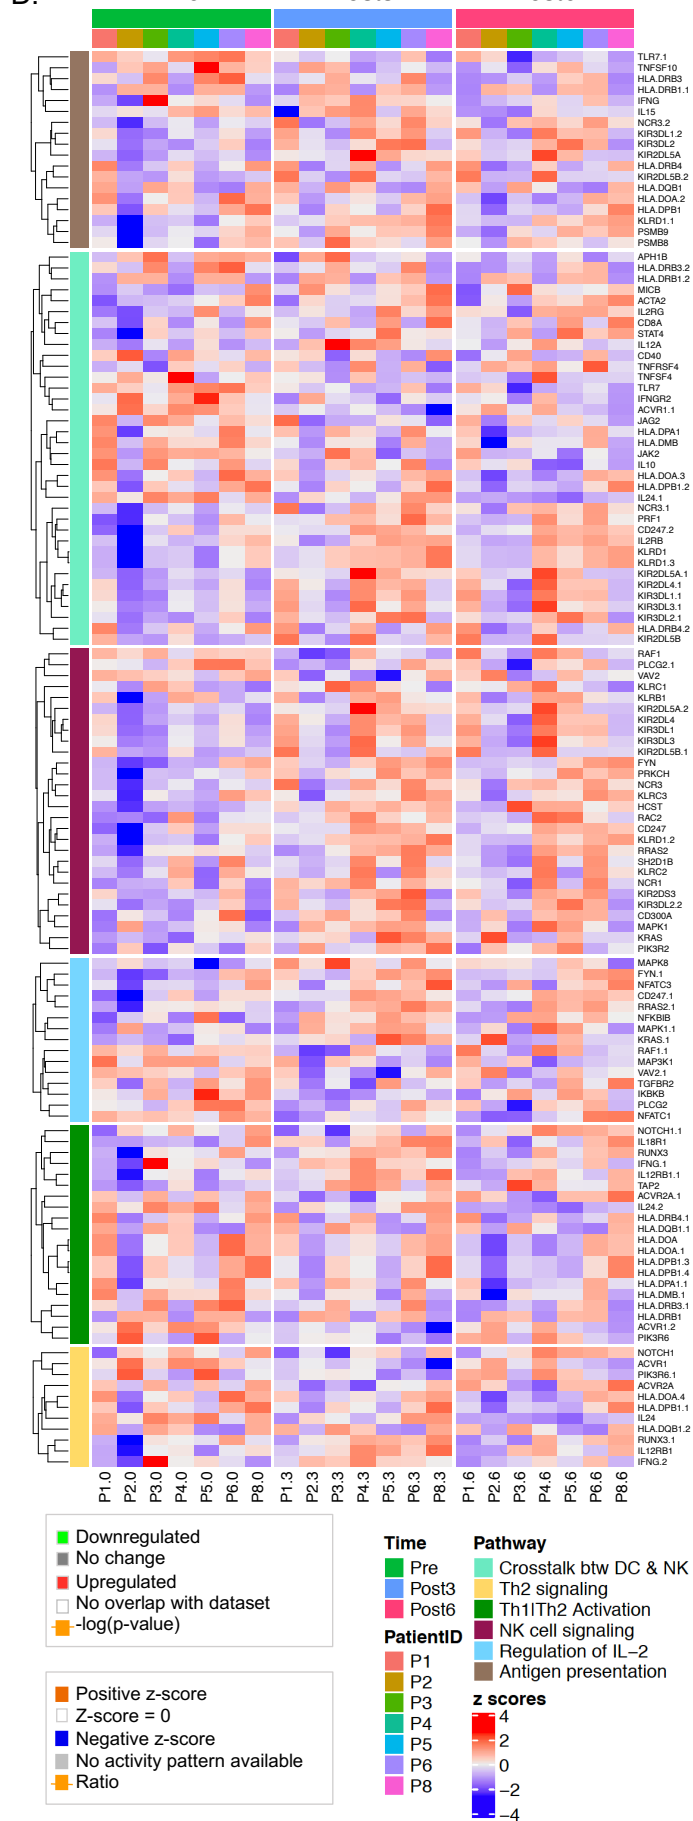

Figure 2





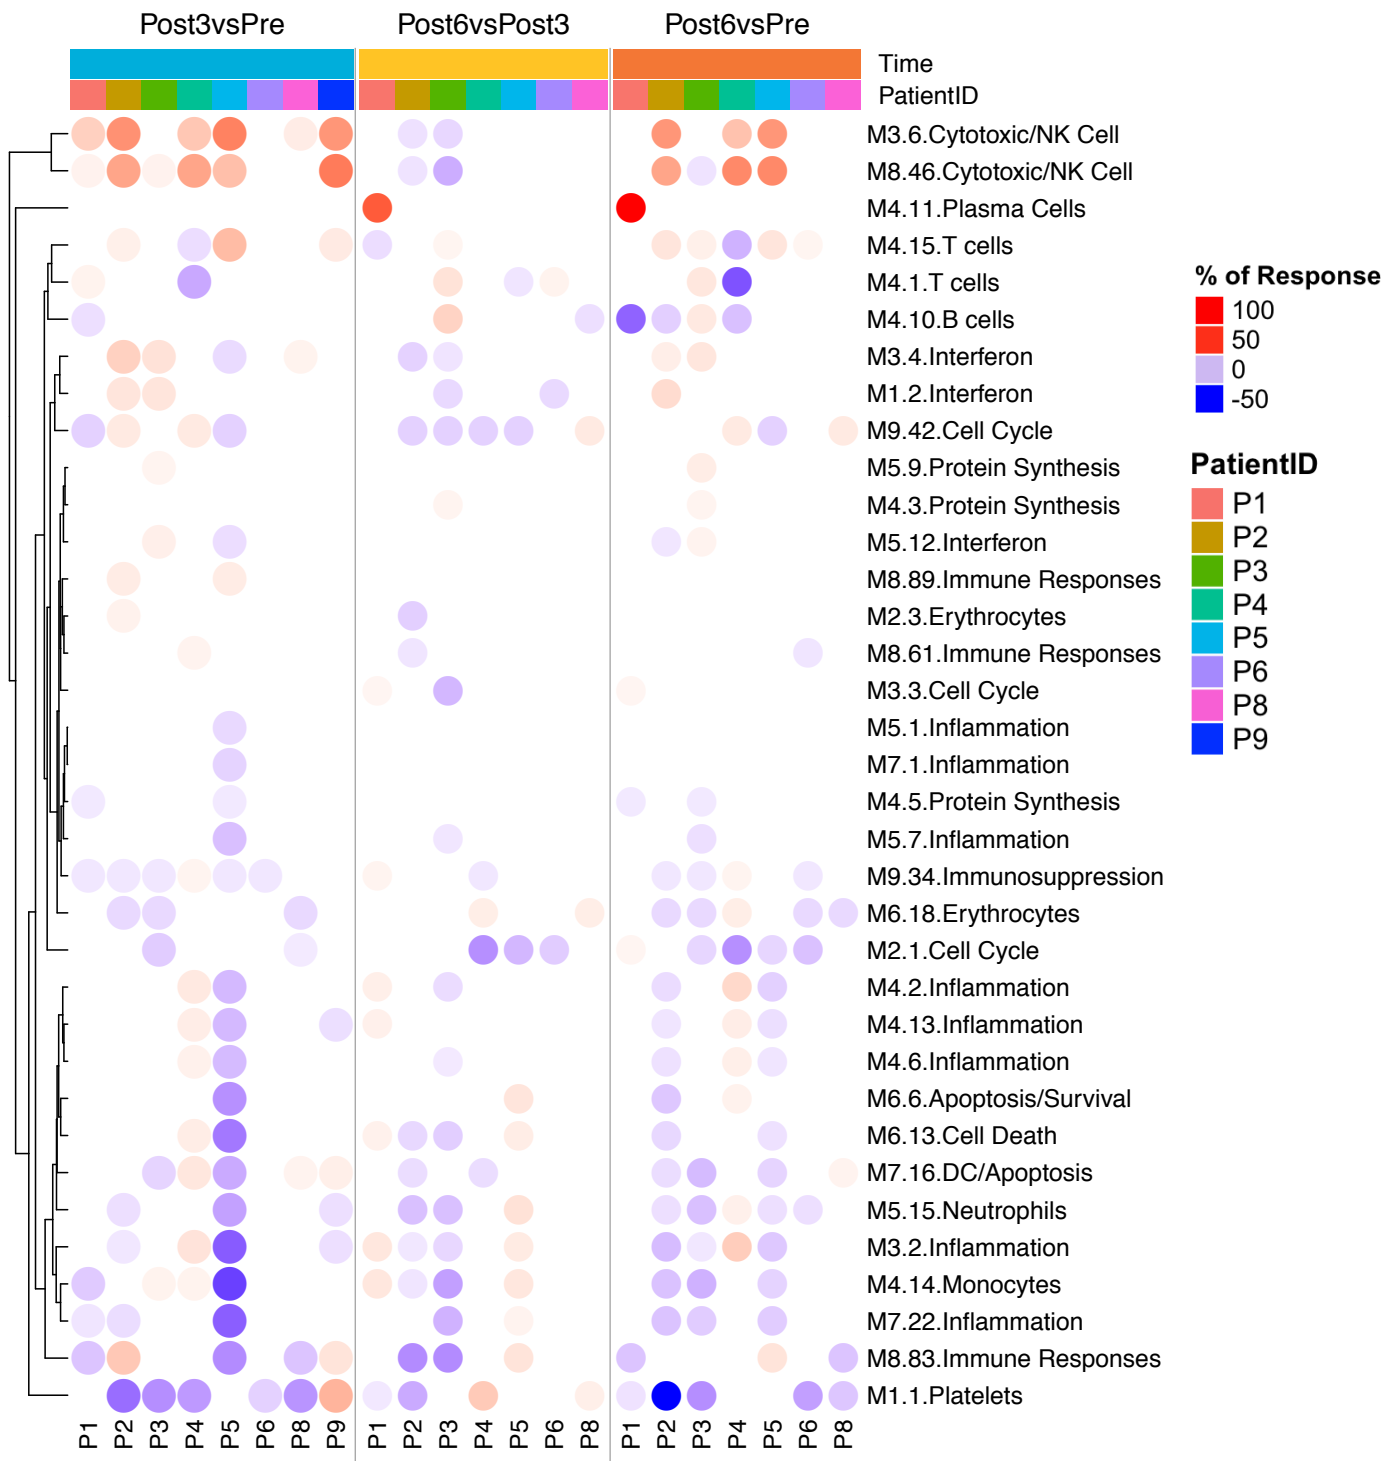

Figure 4

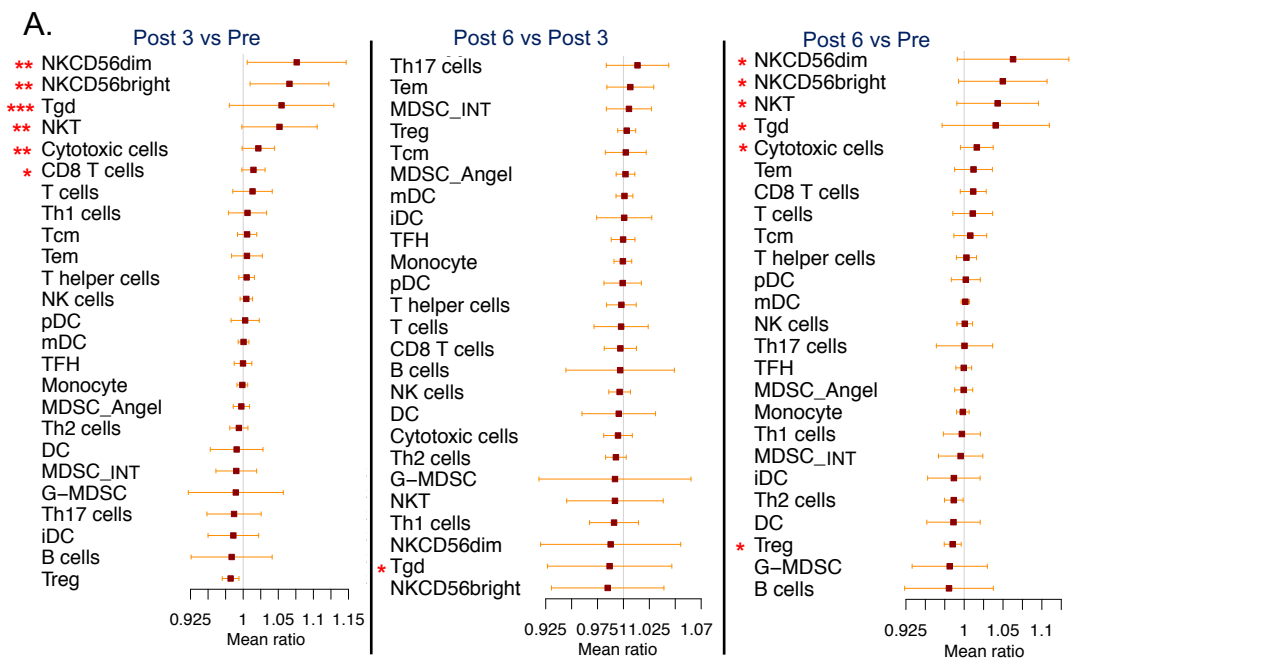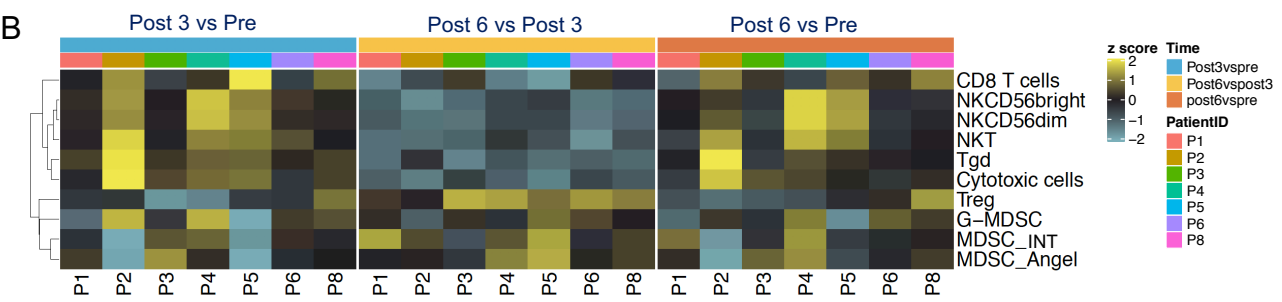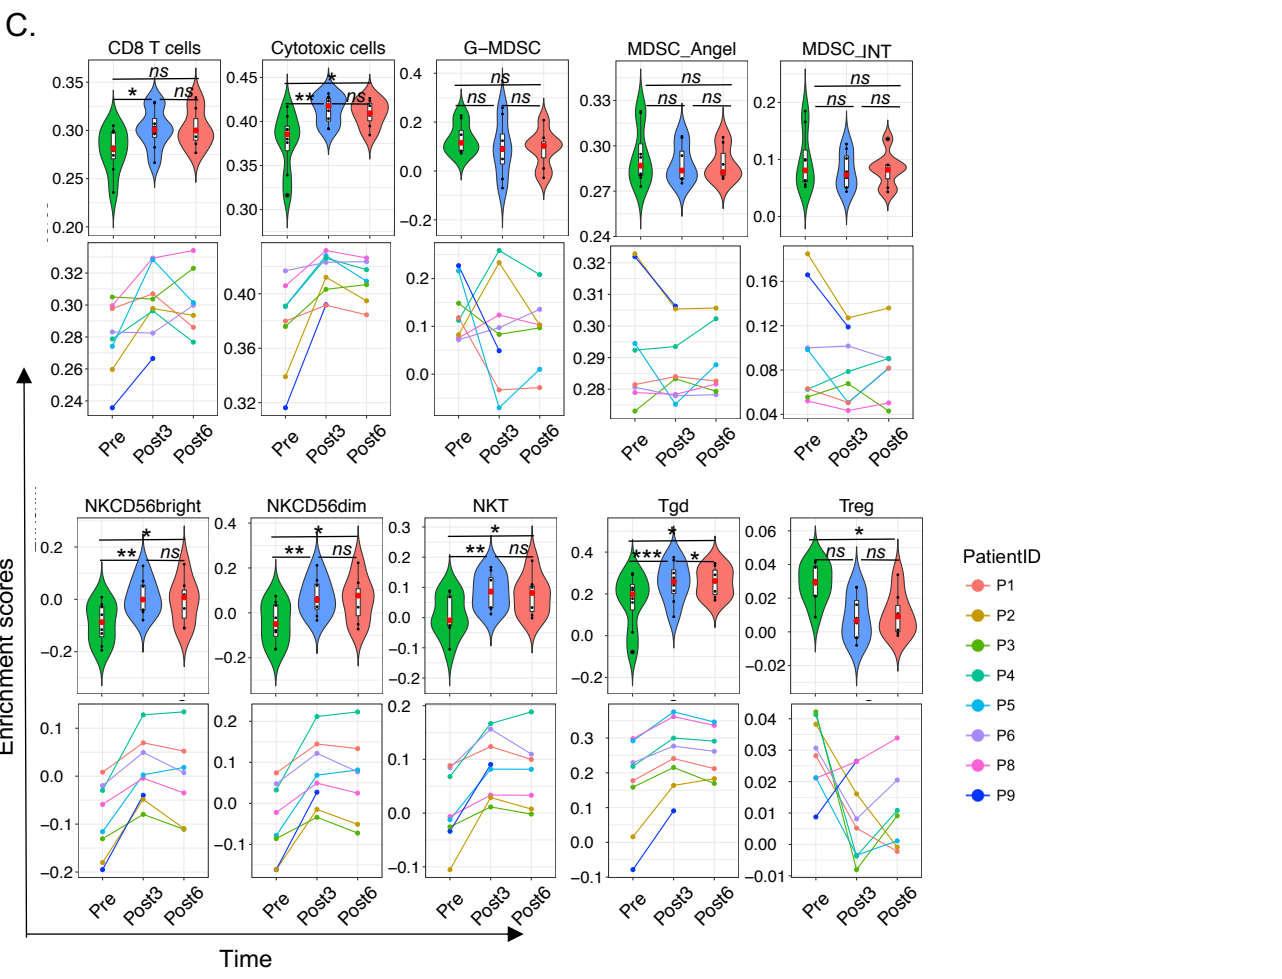

Figure 5

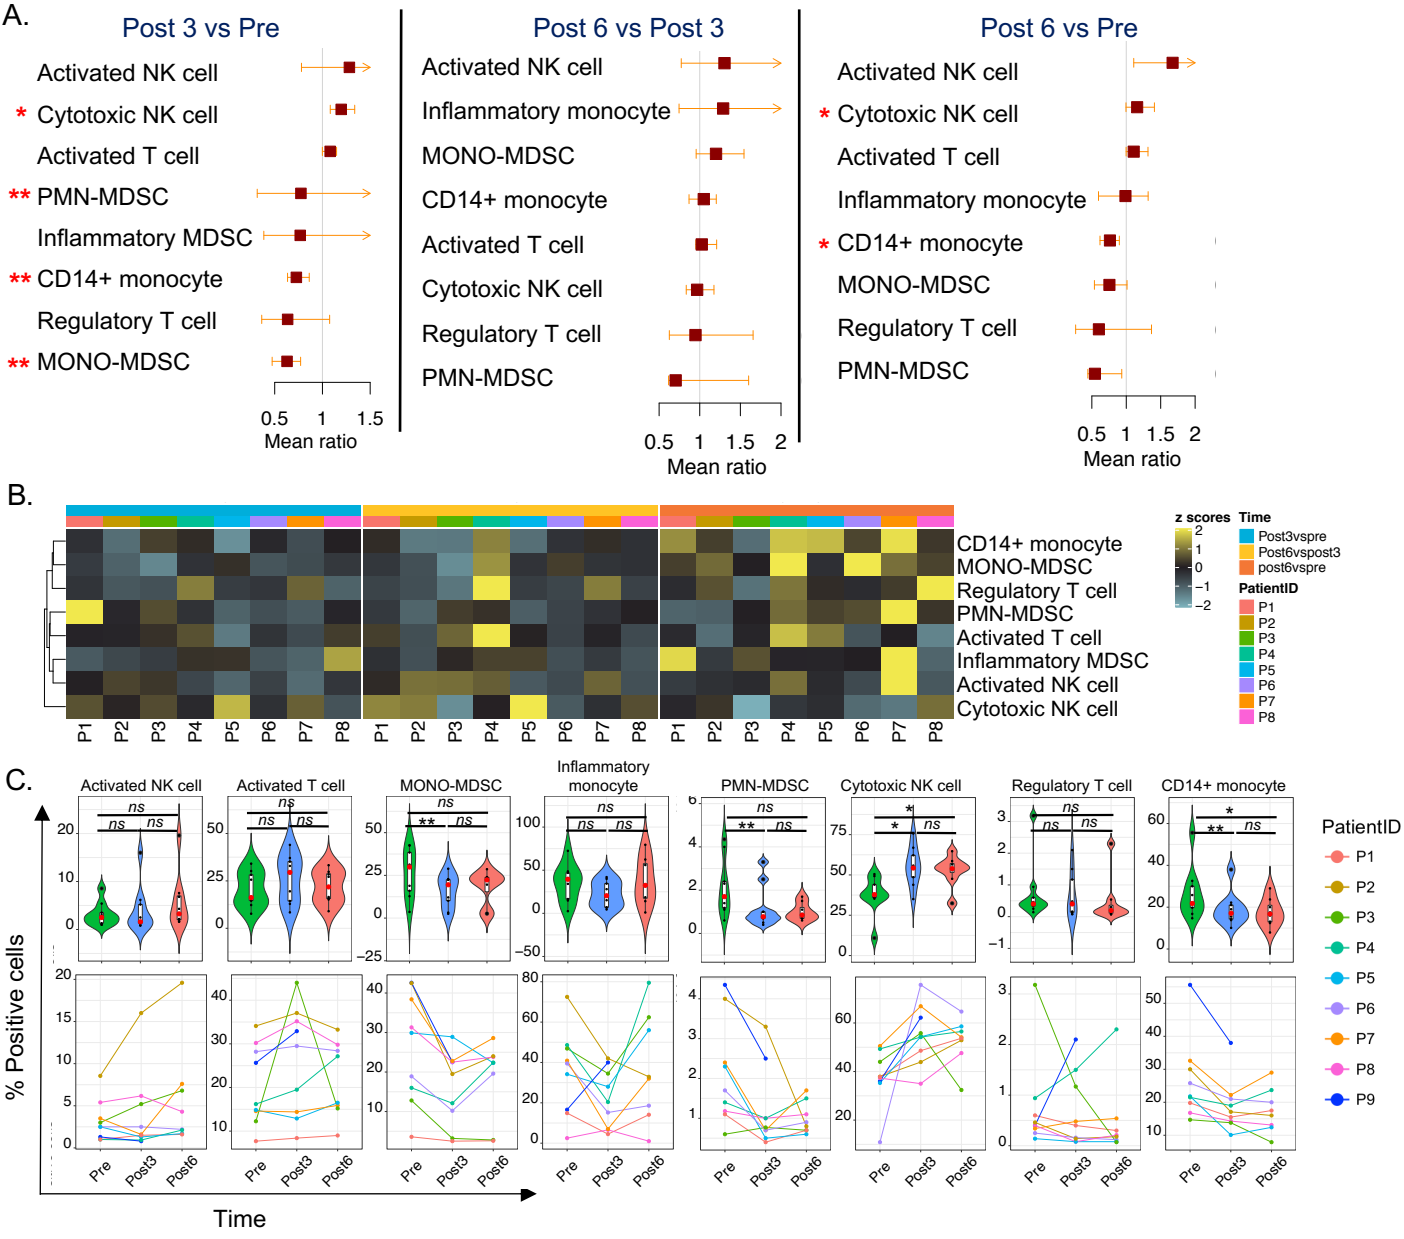

Figure 6

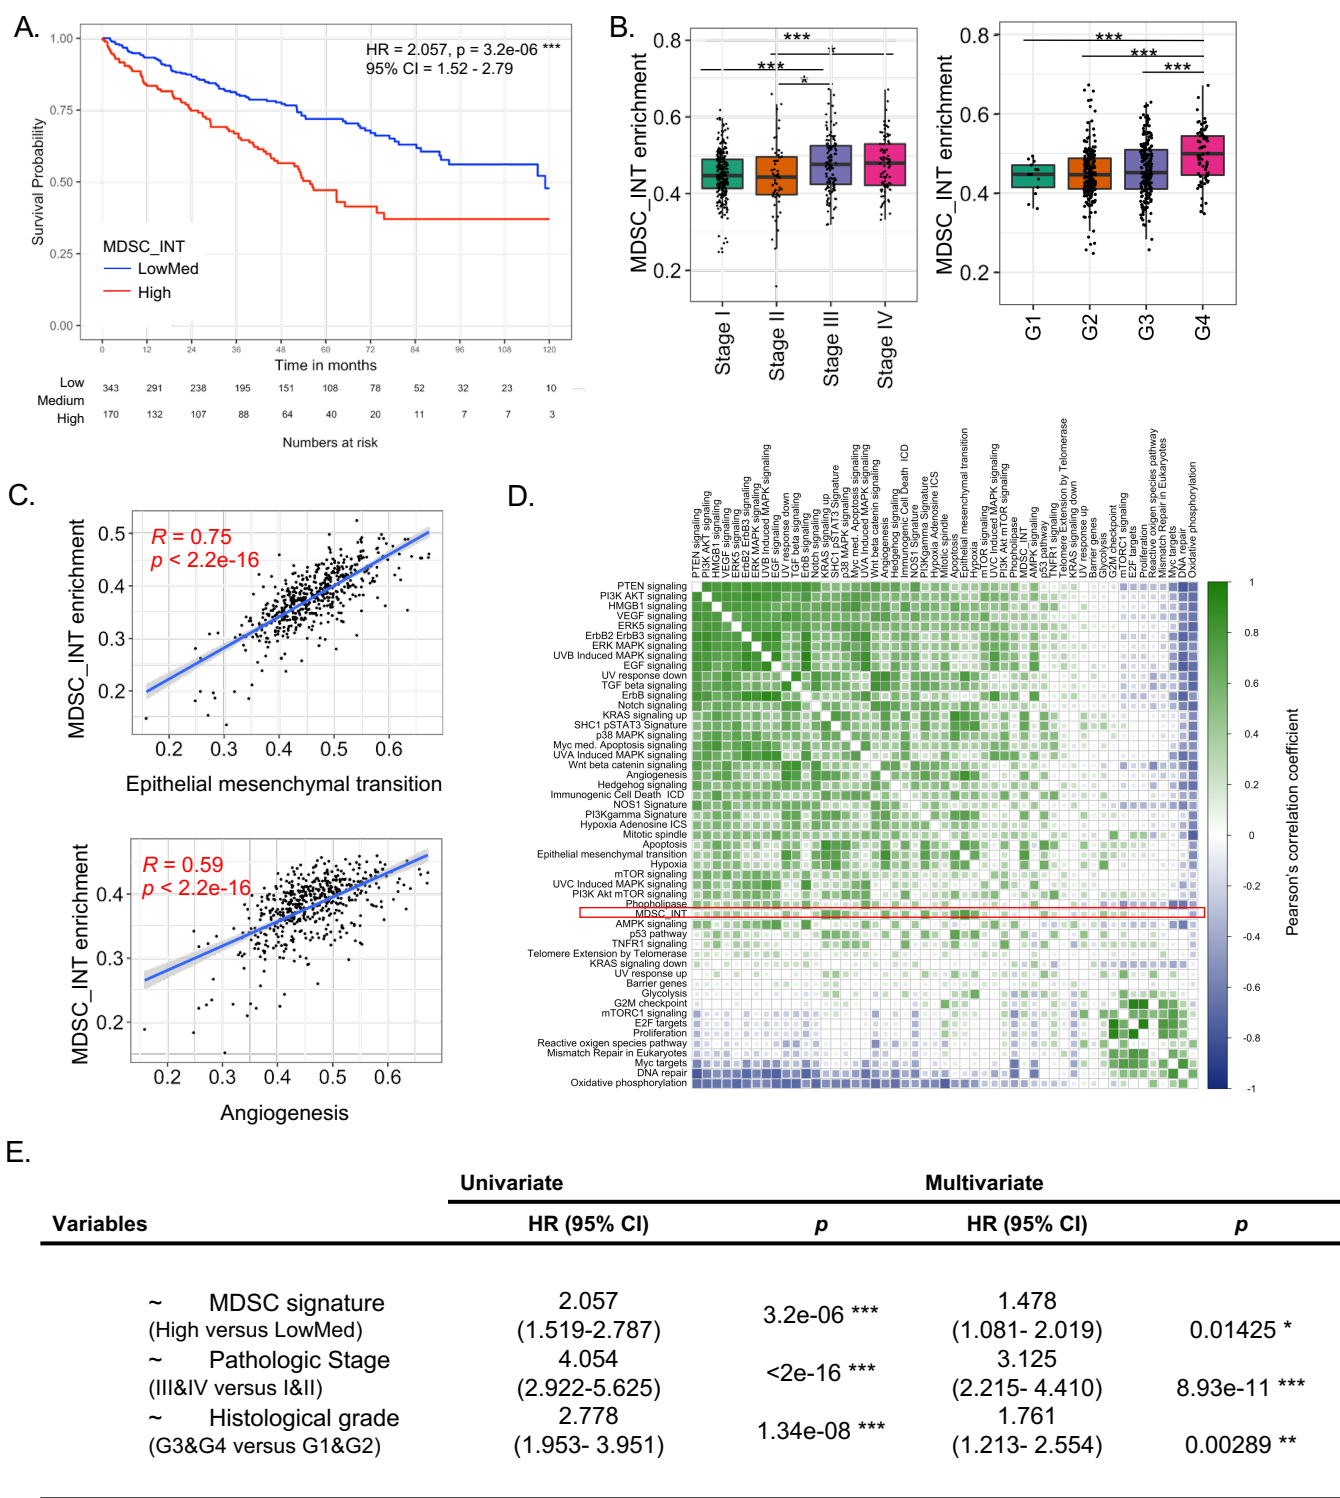

Figure 7

**A. NK cell signaling pathways (3 vs 0)**

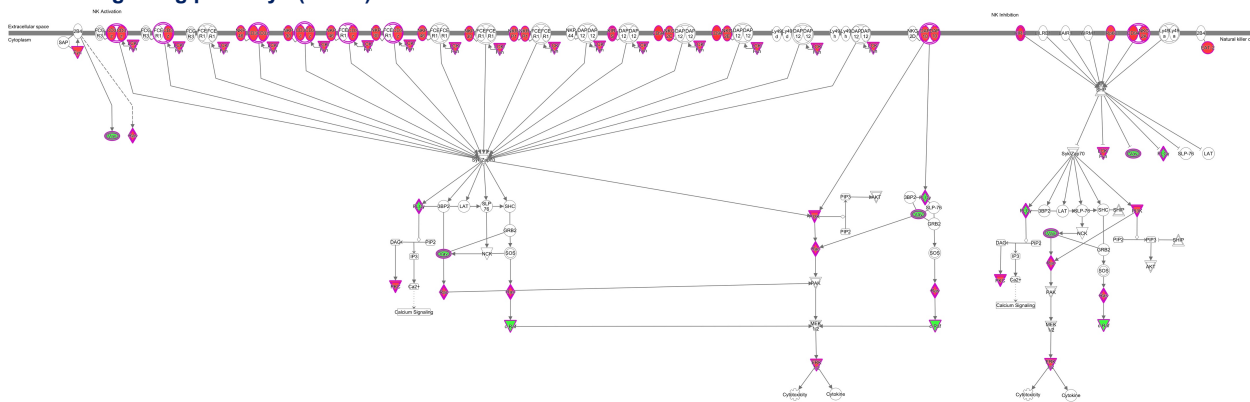

**B. Antigen presentation pathway (6 vs 3)**

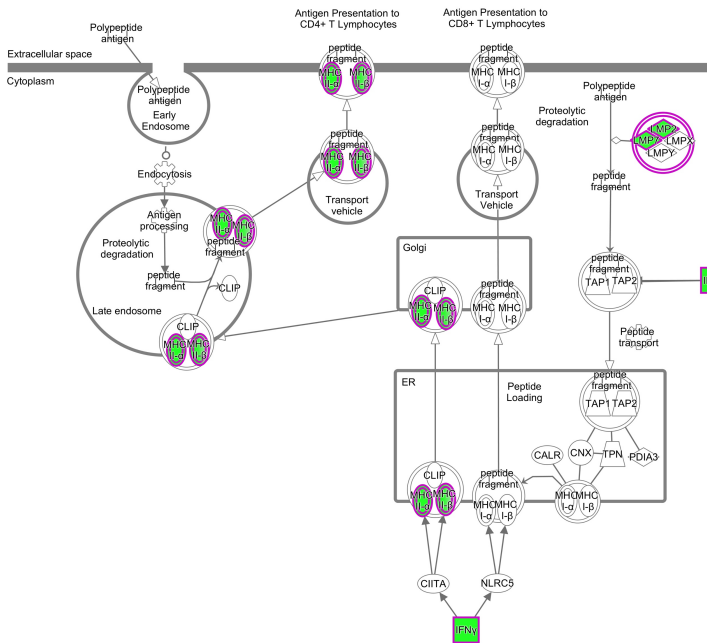

**C. Cross talk between dendritic cells & NK cells (6 vs 0)**

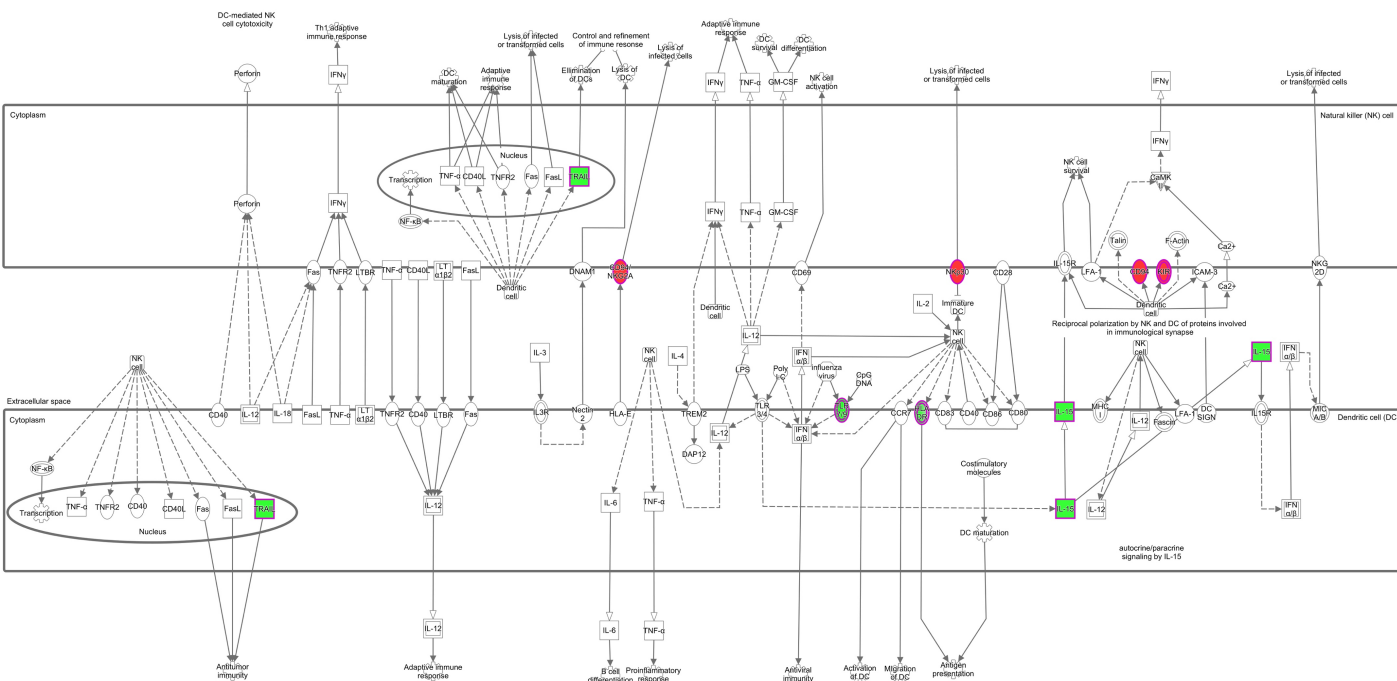

Supplementary Figure 1 : Top pathway in each time point comparison.

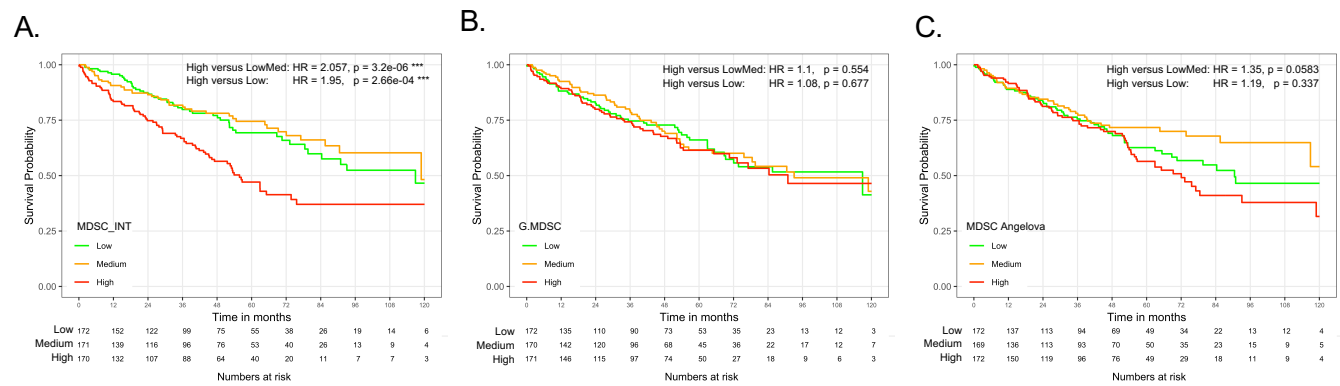

**MDSC\_INT**  
 High versus LowMed: HR = 2.057, p = 3.2e-06 \*\*\*, 95% CI = 1.52 - 2.79  
 High versus Low: HR = 1.95, p = 2.66e-04 \*\*\*, 95% CI = 1.36-2.8

**G.MDSC**  
 High versus LowMed: HR = 1.1, p = 0.554, 95% CI = 0.8-1.51  
 High versus Low: HR = 1.08, p = 0.677, 95% CI = 0.75-1.56

**MDSC\_Angelova**  
 High versus LowMed: HR = 1.35, p = 0.0583, 95% CI = 0.99-1.83  
 High versus Low: HR = 1.19, p = 0.337, 95% CI = 0.84-1.69

**Supplementary Figure 2 : Prognostic value of MDSC signatures.** Kaplan Meier curves showing overall survival (OS) of patients within tertiles of MDSC\_INT (A), granulocytic MDSC (B), and MDSC Angelova (C) enrichment scores. Cox proportional hazards statistics of the high versus LowMed (combination of intermediate and low tertiles) and High versus Low tertiles are shown.

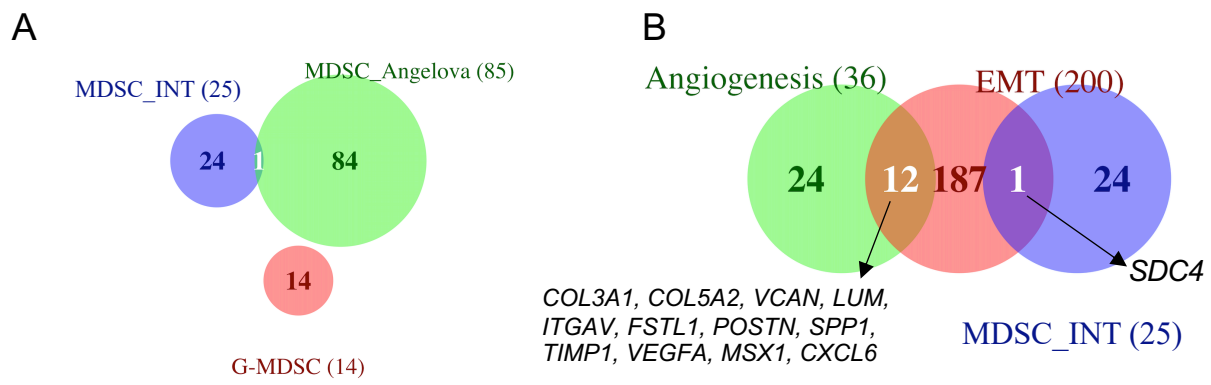

**Supplementary Figure 3:** Venn diagrams of intersection between MDSC signatures; MDSC\_INT, MDSC\_Angelova and G-MDSC (A) , and MDSC\_INT and Cancer hallmark pathways (Angiogenesis and Epithelial mesenchymal transition) (B) . The total number of genes in each area is reported between the parentheses.

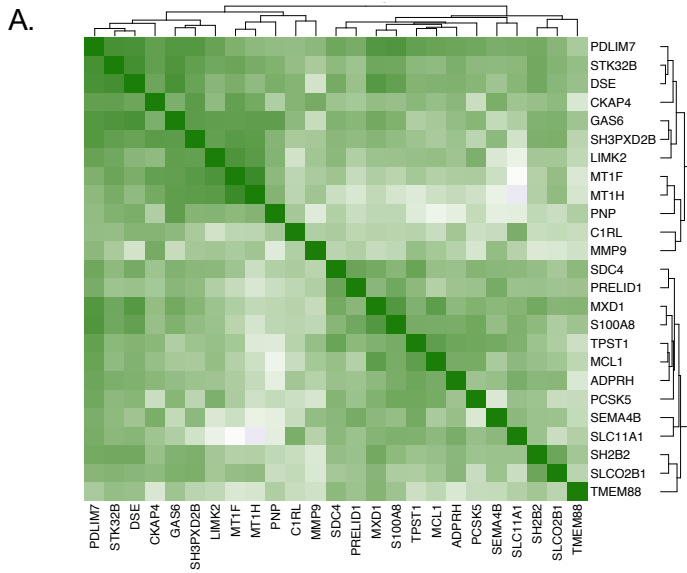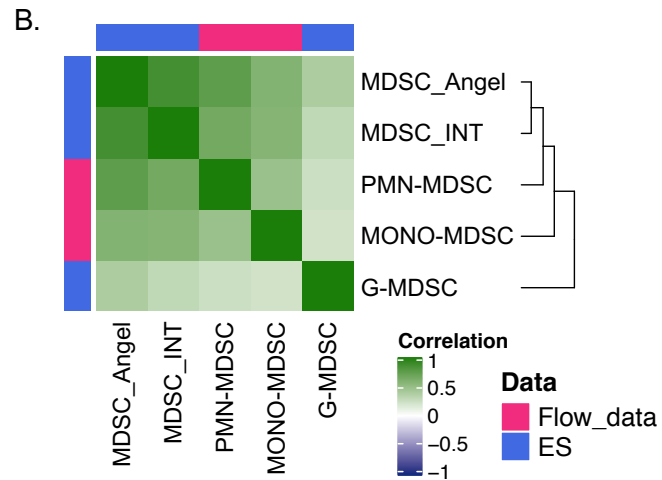

**Supplementary Figure 4 : Pairwise Pearson correlation matrix between (A) 25 genes of the top  $r^2(kmean1)$  of top 100 up-regulated genes from the data set obtained from human MDSC generated in vitro according to a model developed in our laboratory [Huber *et al.* JCI 2018]. (B) enrichment score of MDSC signature and percentage expression cell type by flow cytometry .**

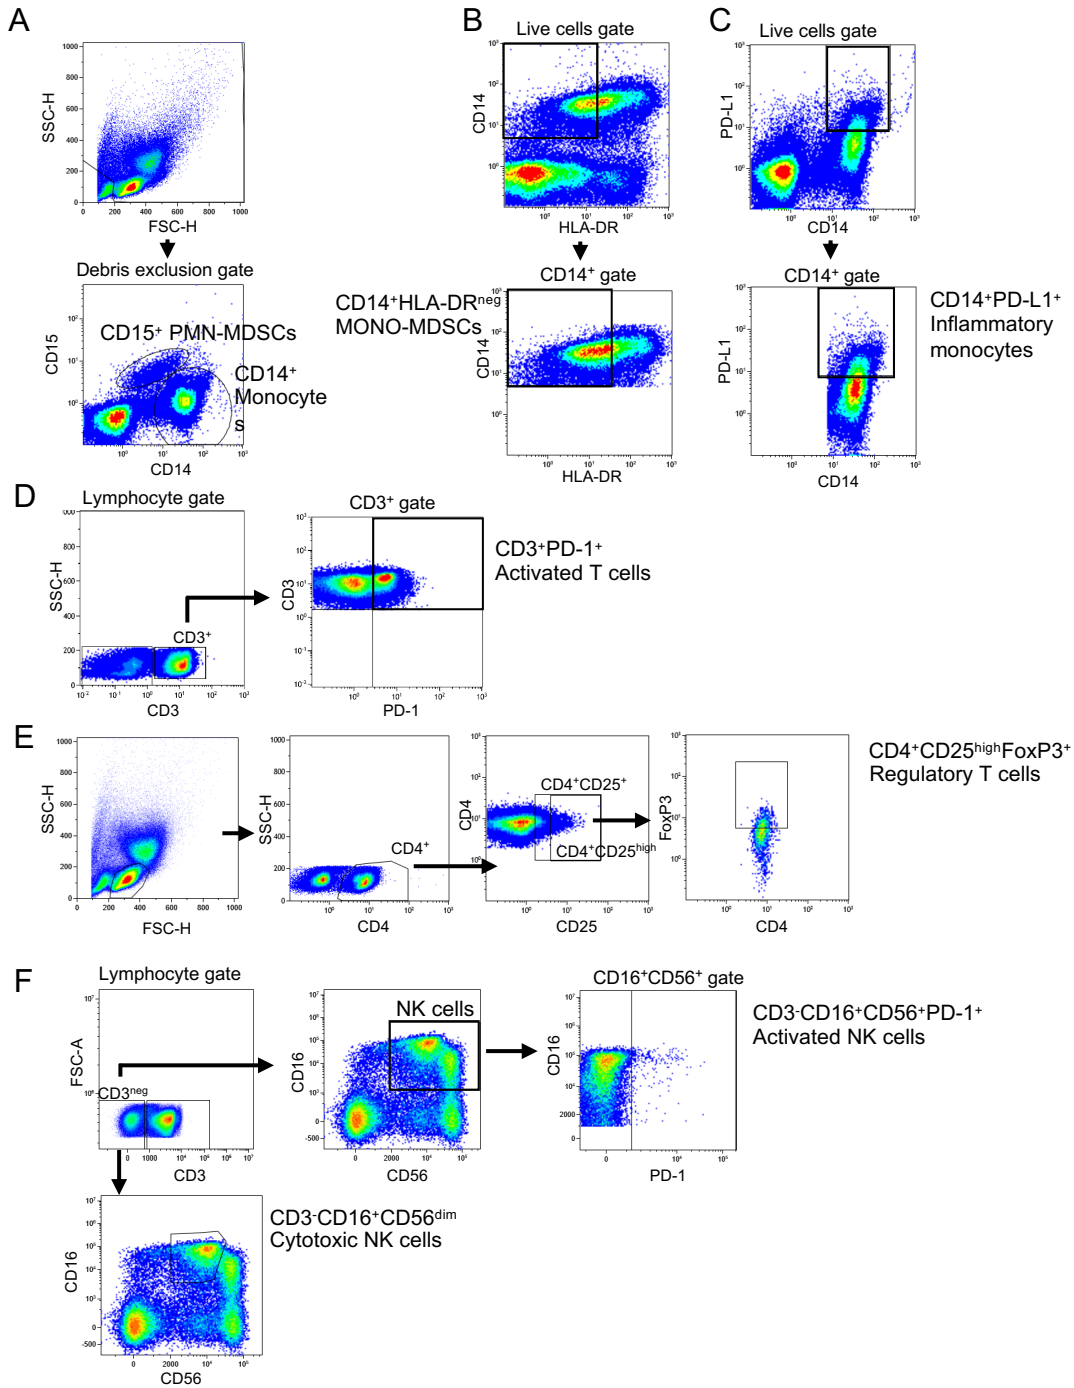

**Supplementary Figure 5: Flow cytometry gating strategies.** Myeloid cell populations: CD15<sup>+</sup> PMN-MDSCs, CD14<sup>+</sup> monocytes, (A); CD14<sup>+</sup>HLA-DR<sup>neg</sup> M-MDSCs (B); CD14<sup>+</sup>PD-L1<sup>+</sup> inflammatory monocytes (C). T and NK cell populations: CD3<sup>+</sup>PD-1<sup>+</sup> activated T cells (D); CD4<sup>+</sup>CD25<sup>hi</sup> FoxP3<sup>+</sup> regulatory T cells (E); CD16<sup>+</sup>CD56<sup>+</sup>PD-1<sup>+</sup> activated NK cells and CD3<sup>-</sup>CD16<sup>+</sup>CD56<sup>dim</sup> cytotoxic NK cells (F).
